# Supplementary material
Source: publisher figshare collection journal article supplement (https://acs.figshare.com/ndownloader/files/26542064)
Supplement: Supplementary file 1 [file 26542064]

1 *Supporting Information*

2 **Capacitive Removal of Heavy Metal Ions from Wastewater via an**  
3 **Electro-Adsorption and Electro-Reaction Coupling Process**

4 Minlin Mao<sup>†</sup>, Tingting Yan<sup>†</sup>, Junjie Shen<sup>‡</sup>, Jianping Zhang<sup>†</sup>, and Dengsong Zhang<sup>†\*</sup>

5 <sup>†</sup>*State Key Laboratory of Advanced Special Steel, School of Materials Science and*  
6 *Engineering, International Joint Laboratory of Catalytic Chemistry, Research Center*  
7 *of Nano Science and Technology, Department of Chemistry, College of Sciences,*  
8 *Shanghai University, Shanghai 200444, China.*

9 <sup>‡</sup>*Department of Chemical Engineering, University of Bath, Bath BA2 7AY, UK.*

10 <sup>\*</sup>*E-mail: dszhang@shu.edu.cn; Tel: +86 21 66137152.*

11  
12  
13  
14 The Supporting Information includes 73 pages, 39 Figures, and 14 Tables.

|    |                                                                                                                                         |     |
|----|-----------------------------------------------------------------------------------------------------------------------------------------|-----|
| 16 | Table of Contents                                                                                                                       |     |
| 17 | Figure S1. Schematic illustration of the synthesis route of the W <sub>18</sub> O <sub>49</sub> /Graphene...                            | S17 |
| 18 | Figure S2. SEM image of the W <sub>18</sub> O <sub>49</sub> /C.....                                                                     | S18 |
| 19 | Figure S3. (a) SEM image, (b-e) EDS mapping, (f) SEM image, (g) TEM image and (h)                                                       |     |
| 20 | HRTEM image of the W <sub>18</sub> O <sub>49</sub> /Graphene.....                                                                       | S19 |
| 21 | Figure S4. (a) TEM image, (b, c) HRTEM and (d) SAED patterns of the                                                                     |     |
| 22 | W <sub>18</sub> O <sub>49</sub> /Graphene. ....                                                                                         | S20 |
| 23 | Figure S5. EDS line scans of the W <sub>18</sub> O <sub>49</sub> /Graphene .....                                                        | S21 |
| 24 | Figure S6. (a) Nitrogen sorption isotherms of the W <sub>18</sub> O <sub>49</sub> /Graphene and W <sub>18</sub> O <sub>49</sub> /C. (b) |     |
| 25 | DFT pore size distribution curves of the W <sub>18</sub> O <sub>49</sub> /Graphene and W <sub>18</sub> O <sub>49</sub> /C .....         | S22 |
| 26 | Figure S7. Dynamic water contact angle analysis of the W <sub>18</sub> O <sub>49</sub> /Graphene, W <sub>18</sub> O <sub>49</sub> /C    |     |
| 27 | materials and AC.....                                                                                                                   | S23 |
| 28 | Figure S8. Raman spectra of the W <sub>18</sub> O <sub>49</sub> /Graphene, W <sub>18</sub> O <sub>49</sub> /C and AC.....               | S24 |
| 29 | Figure S9. XPS spectra of the W <sub>18</sub> O <sub>49</sub> /Graphene.....                                                            | S25 |
| 30 | Figure S10. (a) C 1s and (b) O 1s spectra of the W <sub>18</sub> O <sub>49</sub> /Graphene.....                                         | S26 |
| 31 | Figure S11. Plots of specific capacitance <i>versus</i> scanning rates for W <sub>18</sub> O <sub>49</sub> /Graphene,                   |     |
| 32 | W <sub>18</sub> O <sub>49</sub> /C, and AC in a 1000 mg/L NaCl solution.....                                                            | S27 |
| 33 | Figure S12. Charge-discharge curves of W <sub>18</sub> O <sub>49</sub> /Graphene, W <sub>18</sub> O <sub>49</sub> /C, and AC at 0.2     |     |
| 34 | A/g in a 1000 mg/L NaCl solution.....                                                                                                   | S28 |
| 35 | Figure S13. Cycle stability plots of the W <sub>18</sub> O <sub>49</sub> /Graphene electrode at 10 A/g in a 1000                        |     |
| 36 | mg/L NaCl solution.....                                                                                                                 | S29 |
| 37 | Figure S14. Impedance spectra of W <sub>18</sub> O <sub>49</sub> /Graphene, W <sub>18</sub> O <sub>49</sub> /C, and AC in a 1000 mg/L   |     |

|    |                                                                                                                                                 |     |
|----|-------------------------------------------------------------------------------------------------------------------------------------------------|-----|
| 38 | NaCl solution.....                                                                                                                              | S30 |
| 39 | Figure S15. (a) Charge-discharge curves of the W <sub>18</sub> O <sub>49</sub> /Graphene electrodes in a 1000                                   |     |
| 40 | mg/L NaCl solution. (b) CV curves of the W <sub>18</sub> O <sub>49</sub> /Graphene electrodes in a 1000 mg/L                                    |     |
| 41 | NaCl solution.....                                                                                                                              | S31 |
| 42 | Figure S16. (a) Charge-discharge curves of the W <sub>18</sub> O <sub>49</sub> /C electrodes in a 1000 mg/L                                     |     |
| 43 | NaCl solution. (b) CV curves of the W <sub>18</sub> O <sub>49</sub> /C electrodes in a 1000 mg/L NaCl                                           |     |
| 44 | solution.....                                                                                                                                   | S32 |
| 45 | Figure S17. (a) Charge-discharge curves of the AC electrodes in a 1000 mg/L NaCl                                                                |     |
| 46 | solution. (b) CV curves of the AC electrodes in a 1000 mg/L NaCl solution.....                                                                  | S33 |
| 47 | Figure S18. Plots of salt adsorption capacity of W <sub>18</sub> O <sub>49</sub> /Graphene, W <sub>18</sub> O <sub>49</sub> /C and AC           |     |
| 48 | <i>versus</i> time in a 1000 mg/L NaCl solution at 1.2 V.....                                                                                   | S34 |
| 49 | Figure S19. Plots of salt adsorption capacity of W <sub>18</sub> O <sub>49</sub> /Graphene <i>versus</i> time in a 1000                         |     |
| 50 | mg/L NaCl solution at different voltages.....                                                                                                   | S35 |
| 51 | Figure S20. Plots of salt adsorption capacity of W <sub>18</sub> O <sub>49</sub> /Graphene <i>versus</i> time in                                |     |
| 52 | different concentrations of NaCl solutions at 1.2 V.....                                                                                        | S36 |
| 53 | Figure S21. Plots of salt adsorption rate of W <sub>18</sub> O <sub>49</sub> /Graphene <i>versus</i> time in different                          |     |
| 54 | concentrations of NaCl solutions.....                                                                                                           | S37 |
| 55 | Figure S22. Plots of salt adsorption rate of W <sub>18</sub> O <sub>49</sub> /Graphene, W <sub>18</sub> O <sub>49</sub> /C and AC <i>versus</i> |     |
| 56 | time in a 1000 mg/L NaCl solution at 1.2 V.....                                                                                                 | S38 |
| 57 | Figure S23. Ragone plots of SAR <i>versus</i> SAC of W <sub>18</sub> O <sub>49</sub> /Graphene, W <sub>18</sub> O <sub>49</sub> /C and AC       |     |
| 58 | time in a 1000 mg/L NaCl solution at 1.2 V.....                                                                                                 | S39 |
| 59 | Figure S24. Ragone plots of SAR <i>versus</i> SAC of W <sub>18</sub> O <sub>49</sub> /Graphene in different                                     |     |

|    |                                                                                                                                       |     |
|----|---------------------------------------------------------------------------------------------------------------------------------------|-----|
| 60 | concentrations of NaCl solutions.....                                                                                                 | S40 |
| 61 | Figure S25. Plots of charge efficiency of W <sub>18</sub> O <sub>49</sub> /Graphene, W <sub>18</sub> O <sub>49</sub> /C and AC in     |     |
| 62 | different concentrations of NaCl solutions at 1.2 V.....                                                                              | S41 |
| 63 | Figure S26. Plots of specific energy consumption of the W <sub>18</sub> O <sub>49</sub> /Graphene, W <sub>18</sub> O <sub>49</sub> /C |     |
| 64 | and AC electrode <i>versus</i> SAR in a 1000 mg/L NaCl solution at 1.2 V.....                                                         | S42 |
| 65 | Figure S27. Plots of specific energy consumption of the W <sub>18</sub> O <sub>49</sub> /Graphene <i>versus</i> SAR                   |     |
| 66 | in different concentrations of NaCl solutions.....                                                                                    | S43 |
| 67 | Figure S28. Plots of removal efficiency of heavy metal ions with the W <sub>18</sub> O <sub>49</sub> /Graphene                        |     |
| 68 | electrode <i>versus</i> different times in the multi-component solution containing all the                                            |     |
| 69 | seven metal nitrates (10 mg/L for each) and NaCl (100 mg/L) at 1.2 V.....                                                             | S44 |
| 70 | Figure S29. Plots of pH value <i>versus</i> deionization time of W <sub>18</sub> O <sub>49</sub> /Graphene in the                     |     |
| 71 | multi-component solution containing all the seven metal nitrates (10 mg/L for each)                                                   |     |
| 72 | and 100 mg/L NaCl at 1.2 V.....                                                                                                       | S45 |
| 73 | Figure S30. XRD patterns of materials after soaking in solutions with different pH                                                    |     |
| 74 | values.....                                                                                                                           | S46 |
| 75 | Figure S31. Plots of removal efficiency of heavy metal ion <i>versus</i> pH values in the                                             |     |
| 76 | multi-component solution containing all the seven metal nitrates (10 mg/L for each)                                                   |     |
| 77 | and 100 mg/L NaCl at 1.2 V.....                                                                                                       | S47 |
| 78 | Figure S32. (a) Plots of absorbance <i>versus</i> aniline concentration. (b) Absorbance curves                                        |     |
| 79 | in the multi-component solution containing all the seven metal nitrates (10 mg/L for                                                  |     |
| 80 | each) and 100 mg/L NaCl (Line 1). Absorbance curves after aniline adsorption in the                                                   |     |
| 81 | multi-component solution containing all the seven metal nitrates (10 mg/L for each), 20                                               |     |

|     |                                                                                                                  |     |
|-----|------------------------------------------------------------------------------------------------------------------|-----|
| 82  | mg/L aniline and 100 mg/L NaCl (Line 2). Absorbance curves before aniline adsorption                             |     |
| 83  | in the multi-component solution containing all the seven metal nitrates (10 mg/L for                             |     |
| 84  | each), 20 mg/L aniline and 100 mg/L NaCl (Line 3).....                                                           | S48 |
| 85  | Figure S33. (a) Plots of absorbance <i>versus</i> methyl blue concentration. (b) Absorbance                      |     |
| 86  | curves in the multi-component solution containing all the seven metal nitrates (10 mg/L                          |     |
| 87  | for each) and 100 mg/L NaCl (Line 1). Absorbance curves after methyl blue adsorption                             |     |
| 88  | in the multi-component solution containing all the seven metal nitrates (10 mg/L for                             |     |
| 89  | each), 20 mg/L aniline and 100 mg/L NaCl (Line 2). Absorbance curves before methyl                               |     |
| 90  | blue adsorption in the multi-component solution containing all the seven metal nitrates                          |     |
| 91  | (10 mg/L for each), 20 mg/L methyl blue and 100 mg/L NaCl (Line 3).....                                          | S49 |
| 92  | Figure S34. CV curves of the W <sub>18</sub> O <sub>49</sub> /Graphene electrodes at 0.2 mV/s in 100 mg/L        |     |
| 93  | CaCl <sub>2</sub> at a constant voltage of 1.2 V.....                                                            | S50 |
| 94  | Figure S35. XRD patterns of W <sub>18</sub> O <sub>49</sub> /Graphene before and after heavy metal ion           |     |
| 95  | adsorption in single-component metal nitrate solution solutions (metal nitrate (10                               |     |
| 96  | mg/L).....                                                                                                       | S51 |
| 97  | Figure S36. XRD patterns of W <sub>18</sub> O <sub>49</sub> /Graphene after Na-adsorbed and Na-desorbed in       |     |
| 98  | 100 mg/L NaCl solutions.....                                                                                     | S52 |
| 99  | Figure S37. XRD patterns of W <sub>18</sub> O <sub>49</sub> /Graphene before and after heavy metal ion           |     |
| 100 | adsorption in the multi-component solution containing all the seven metal nitrates (10                           |     |
| 101 | mg/L for each) and 100 mg/L NaCl at a constant voltage of 1.2 V.....                                             | S53 |
| 102 | Figure S38. (a) CV curves at a scanning rate of 0.2 mV/s in 100 mg/L Pb(NO <sub>3</sub> ) <sub>2</sub>           |     |
| 103 | solutions, (b) CV curves at a scanning rate of 0.2 mV/s in 100 mg/L Cr(NO <sub>3</sub> ) <sub>3</sub> solutions, |     |

|     |                                                                                                                |     |
|-----|----------------------------------------------------------------------------------------------------------------|-----|
| 104 | (c) CV curves at a scanning rate of 0.2 mV/s in 100 mg/L Cd(NO <sub>3</sub> ) <sub>2</sub> solutions, (d) CV   |     |
| 105 | curves at a scanning rate of 0.2 mV/s in 100 mg/L Fe(NO <sub>3</sub> ) <sub>3</sub> solutions, (e) CV curves   |     |
| 106 | at a scanning rate of 0.2 mV/s in 100 mg/L Cu(NO <sub>3</sub> ) <sub>2</sub> solutions, (f) CV curves at a     |     |
| 107 | scanning rate of 0.2 mV/s in 100 mg/L Ni(NO <sub>3</sub> ) <sub>2</sub> solutions, (g) CV curves at a scanning |     |
| 108 | rate of 0.2 mV/s in 100 mg/L Co(NO <sub>3</sub> ) <sub>2</sub> solutions.....                                  | S54 |
| 109 | Figure S39. CV curves at a scanning rate of 0.2 mV/s in the multi-component solution                           |     |
| 110 | containing all the seven metal nitrates (10 mg/L for each) and 100 mg/L NaCl.....                              | S55 |
| 111 | Table S1. Summary of properties of the materials.....                                                          | S57 |
| 112 | Table S2. Summary of relative intensity ratios of all materials in Raman spectra....                           | S58 |
| 113 | Table S3. Elemental contents of the synthesized materials determined by XPS                                    |     |
| 114 | spectra.....                                                                                                   | S59 |
| 115 | Table S4. Comparison of the W <sub>18</sub> O <sub>49</sub> /Graphene materials with the state-of-the-art      |     |
| 116 | materials.....                                                                                                 | S60 |
| 117 | Table S5. Removal efficiency after 120 min of capacitive adsorption in the complex                             |     |
| 118 | binary-component solutions [metal nitrate (10 mg/L) and NaCl (100 mg/L)] at 1.2 V by                           |     |
| 119 | ICP-OES tested.....                                                                                            | S61 |
| 120 | Table S6. Removal efficiency after 120 min of capacitive adsorption in the complex                             |     |
| 121 | binary-component solutions [metal nitrate (50 mg/L) and NaCl (100 mg/L)] at 1.2 V by                           |     |
| 122 | ICP-OES tested.....                                                                                            | S62 |
| 123 | Table S7. Removal efficiency after 120 min of capacitive adsorption in the multi-                              |     |
| 124 | component solution containing all the seven metal nitrates (10 mg/L for each) and 100                          |     |
| 125 | mg/L NaCl at a constant voltage of 1.2 V by ICP-OES tested.....                                                | S63 |

|     |                                                                                        |     |
|-----|----------------------------------------------------------------------------------------|-----|
| 126 | Table S8. Removal efficiency after 120 min of capacitive adsorption in the multi-      |     |
| 127 | component solution containing all the seven metal nitrates (10 mg/L for each) and 500  |     |
| 128 | mg/L NaCl at a constant voltage of 1.2 V by ICP-OES tested.....                        | S64 |
| 129 | Table S9. Removal efficiency after 120 min of capacitive adsorption in the multi-      |     |
| 130 | component solution containing all the seven metal nitrates (50 mg/L for each) and 100  |     |
| 131 | mg/L NaCl at a constant voltage of 1.2 V by ICP-OES tested.....                        | S65 |
| 132 | Table S10. Removal efficiency after 120 min of capacitive adsorption in the multi-     |     |
| 133 | component solution containing all the seven metal nitrates (50 mg/L for each) and 500  |     |
| 134 | mg/L NaCl at a constant voltage of 1.2 V by ICP-OES tested.....                        | S66 |
| 135 | Table S11. Heavy metal ions concentration of 20 cycles after 120 min of capacitive     |     |
| 136 | adsorption in the multi-component solution containing all the seven metal nitrates (10 |     |
| 137 | mg/L for each) and 100 mg/L NaCl at a constant voltage of 1.2 V by ICP-OES             |     |
| 138 | tested.....                                                                            | S67 |
| 139 | Table S12. Removal efficiency after 120 min of capacitive adsorption in the multi-     |     |
| 140 | component solution containing all the seven metal nitrates (10 mg/L for each) and 100  |     |
| 141 | mg/L CaCl <sub>2</sub> at a constant voltage of 1.2 V by ICP-OES tested.....           | S68 |
| 142 | Table S13. Removal efficiency after 120 min of capacitive adsorption in the multi-     |     |
| 143 | component solution containing all the seven metal nitrates (10 mg/L for each) and 500  |     |
| 144 | mg/L CaCl <sub>2</sub> at a constant voltage of 1.2 V by ICP-OES tested.....           | S69 |
| 145 | Table S14. The area corresponding to the peak position of XPS.....                     | S70 |
| 146 |                                                                                        |     |

## EXPERIMENTAL SECTION

### Chemicals.

NaCl (AR, 99%), Pb(NO<sub>3</sub>)<sub>2</sub> (AR, 99%), Fe(NO<sub>3</sub>)<sub>3</sub> (AR, 99%), Ni(NO<sub>3</sub>)<sub>2</sub> (AR, 99%), Co(NO<sub>3</sub>)<sub>2</sub> (AR, 99%), Cu(NO<sub>3</sub>)<sub>2</sub> (AR, 99%), Cr(NO<sub>3</sub>)<sub>3</sub> (AR, 99%), Cd(NO<sub>3</sub>)<sub>2</sub> (AR, 99%), (NH<sub>4</sub>)<sub>10</sub>W<sub>12</sub>O<sub>41</sub>~xH<sub>2</sub>O (AR, 99%), aniline (AR, 99%), methyl blue (AR, 99%), Graphene and CH<sub>3</sub>CH<sub>2</sub>OH (AR, 99%) were purchased from Sinopharm Chemical Reagent Co. Ltd. Dopamine hydrochloride (AR, 99%) and NH<sub>3</sub>·H<sub>2</sub>O (28-30%) were obtained from Aladdin Chemistry Co. (Shanghai, China).

**Preparation of W<sub>18</sub>O<sub>49</sub>/C.** W<sub>18</sub>O<sub>49</sub>/C samples were synthesized by a simple and reasonable synthesis scheme. 1.2 g of (NH<sub>4</sub>)<sub>10</sub>W<sub>12</sub>O<sub>41</sub>~xH<sub>2</sub>O was added to 100 mL of tris-buffer solution (pH = 8.5) with a 5-min ultrasonic treatment. The mixed solution was heated and stirred for 30 min at 80°C. 0.4 g of dopamine hydrochloride was added to the above solution and stirred for 120 min. Then 160 mL of CH<sub>3</sub>CH<sub>2</sub>OH was added to the suspension and stirred for 1 h. Finally, 1.2 mL of NH<sub>3</sub>·H<sub>2</sub>O was added to the solution, stirred for 120 min, then centrifuged with CH<sub>3</sub>CH<sub>2</sub>OH, washed, and dried in vacuum for 12 h. The obtained mixtures were carbonized in a nitrogen atmosphere at 750 °C for 4 h (5 °C/min) to obtain W<sub>18</sub>O<sub>49</sub>/C.

**The tris-buffer solutions preparation:** 2 g of trimethylol aminomethane was dissolved in 2 L deionized water, and the pH value of the solution was adjusted to 8.5 by adding 0.1 mol/L hydrochloric acid.

### Characterization.

The morphology and structure of the materials were observed by SEM (Sigma-300),



TEM (JEOL JEM-200CX), and HRTEM (FEI Tecnai G2 F20). The structure composition of the materials was explored by X-ray diffractometer (XRD) (X-ray diffractometer, Cu-K-  $\alpha$ , 40kV mA). The composition of the sample was analyzed by PHI-5300 X-ray photoelectron spectroscopy (XPS). The Raman spectra were measured with 633 nm laser on HORIBA Science Raman spectrometer. The in-situ Raman measurements were carried out in the voltage range of  $-0.6$  to  $0.6$  V at a CV scanning rate of  $0.2$  mV/s using the 633 nm Ar<sup>+</sup> laser Raman spectrometer (HORIBA Science). The concentration of ions was tested by ICP-OES. The isothermal adsorption-desorption curve of nitrogen was studied via Autosorb-IQ<sub>2</sub>. The specific surface area and pore size distribution of the samples were calculated by Brunauer-Emmett-Tell (BET) method and density functional theory (DFT) model, respectively. The wettability of the sample to water was tested by Kruss and DSA100 droplet shape analyzer. The electrochemical performance of the samples was evaluated by an electrochemical workstation (CHI 660E Chenhua, Shanghai). The concentrations of the aniline and methyl blue organic pollutants were detected by UV-vis spectrophotometer

#### **Electrochemical Experiments.**

The polytetrafluoroethylene (PTFE), conductive carbon black and the prepared material (5 mg) were fully mixed at a 1:1:8 mass ratio to make the square film, which was cast on graphite film (GF) collector to make asymmetric capacitive deionization experimental working electrode. The CV and galvanostatic charge-discharge (GCD) curves and electrochemical impedance spectroscopy (EIS) were measured in the 1000 mg/L NaCl solutions with a three-electrode system. The calomel electrode and GF serve

as reference electrode and counter electrode, respectively. The capacitance is theoretically calculated by formula (Eq. S1):

$$C = \frac{fIdV}{2mv\Delta V} \quad (S1)$$

$C$  is the capacitance (F/g),  $I$  is the response current density (A),  $m$  is the mass of active material (g),  $v$  is the scanning rate (V/s), and  $\Delta V$  is the applied voltage window during the CV test (V).

The thickness of electrodes is measured by a Micrometer.  $T_1$  is thickness of electrodes ( $\mu\text{m}$ ),  $T_2$  is average total thickness (882  $\mu\text{m}$ ),  $T_3$  is average current collector (GF) thickness (866  $\mu\text{m}$ ). Both the  $T_2$  and  $T_3$  are measured by a micrometer. The thickness of electrodes is calculated by formula (Eq. S2) in theory:

$$T_1 = T_2 - T_3 \quad (S2)$$

The thickness of electrodes for electrochemical test of CV, GCD and EIS is closed to 16  $\mu\text{m}$ .

#### **Batch-Mode Capacitive Removal Experiments.**

PTFE, conductive carbon black and the prepared material (40 mg) were fully mixed at a 1:1:8 mass ratio to make the square film, which was cast on graphite film (GF) collector to make asymmetric capacitive removal experimental working electrode. Meanwhile, the symmetric electrode was made by fully mixing polytetrafluoroethylene (PTFE), conductive carbon black and activated carbon (40 mg) according to the mass ratio of 1:1:8. In the comparative experiment, the working electrode and counter electrode of AC electrode were prepared in the same way. The spacer is placed between two electrodes to separate them. 65 mL of NaCl solution circulates through the electrode through the peristaltic pump at 40 mL/min. The conductivity meter (Seven

Multi of Mettler Toledo) is used to monitor the electrical conductivity of NaCl solution.

The pH value of the solution is adjusted by using 0.1 mol L<sup>-1</sup> NaOH or HNO<sub>3</sub> solutions to make the range between 4 and 8.

The capacitive removal experiments in NaCl solutions: 65 mL of NaCl solution is circulated through the electrode by a peristaltic pump at the speed of 40 mL/min at 1.2 V for 120 min. The conductivity of NaCl solution was recorded on-line by a conductivity meter (Seven Multi of Mettler Toledo). The salt adsorption capacity (SAC) was calculated by formula (Eq. S3) in theory:

$$SAC = \frac{(C_0 - C)V_b}{m} \quad (S3)$$

SAC stands for the deionized mass specific capacitance,  $C_0$  stands for the initial concentration, and  $C_t$  stands for the final concentration,  $V$  represents the solution volume (L) and  $m$  stands for the quality of electrode material (g).

On the basis of following equation, the salt adsorption rate (SAR, mg g<sup>-1</sup> min<sup>-1</sup>) could be calculated (Eq. S4):<sup>1, 2</sup>

$$SAR = \frac{SAC}{t} \quad (S4)$$

Where  $t$  (min) stands for the desalination time.

The average salt removal rate (ASAR, mg g<sup>-1</sup> min<sup>-1</sup>) is the average of all SAR values obtained throughout the desalination period.<sup>3, 4</sup>

On the basis of following equation, for constant-voltage, the specific energy consumption (SEC<sup>-1</sup>, mg J<sup>-1</sup>) could be calculated (Eq. S5):<sup>5, 6</sup>

$$SEC^{-1} = \frac{(C_0 - C_t)V}{V_d \int_0^t I dt} \quad (S5)$$

Where  $I$  (A) and  $V_d$  (V) respectively stand for the time dependent current and applied

voltage.

On the basis of following equation, the charge efficiency ( $\Lambda$ , %) could be calculated

(Eq. S6):<sup>7</sup>

$$\Lambda = \frac{\Gamma \times F}{\Sigma} \quad (\text{S6})$$

Where  $\Gamma$ ,  $F$  and  $\Sigma$  respectively stand for deionization capacity, Faraday constant and

obtained by integrating current.

On the basis of following equation, the energy consumption (EC, Wh g<sup>-1</sup>) could be

calculated (Eq. S7):<sup>8</sup>

$$\text{EC} = \frac{V_d \int_0^t I dt}{m} \quad (\text{S7})$$

On the basis of following equation, the water recovery (WR, %) could be calculated

(Eq. S8):<sup>6,8</sup>

$$\text{WR} = \frac{V_1 t_1}{V_1 t_1 + V_2 t_2} \quad (\text{S8})$$

Where  $V_1$ ,  $t_1$ ,  $V_2$  and  $t_2$  stand for the volume of initial NaCl solution, the time of NaCl

removed in one cycle, the volume of recuperative initial NaCl solution and the time of

recuperating initial NaCl solution. There is concentration recycle, resulting in  $V_1 = V_2$ .

On the basis of following equation, the product water-specific Gibbs free energy ( $\Delta g$ ,

J g<sup>-1</sup>) could be calculated (Eq. S9):<sup>9</sup>

$$\Delta g = 2RT \left\{ \frac{C_0}{WR} \ln \left[ \frac{C_0 - C_t WR}{C_0(1 - WR)} \right] - C_t \ln \left[ \frac{C_0 - C_t WR}{C_t(1 - WR)} \right] \right\} \quad (\text{S9})$$

Where  $R$  and  $T$  stand for the ideal gas constant and the absolute temperature.

On the basis of following equation, the energy efficiency (EE, %) could be calculated

(Eq. S10):<sup>9</sup>

$$\text{EE} = \frac{\Delta g}{\text{EC}} \quad (\text{S10})$$

258

259 The removal efficiency ( $C$ ) was calculated by formula (Eq. S11) in theory:

260 
$$C = \frac{C_0 - C_t}{C_t} \quad (\text{S11})$$

261  $C$  stands for the removal efficiency,  $C_0$  stands for the initial concentration, and  $C_t$  stands  
262 for the final concentration.

263 The capacitive removal experiments in the binary-component heavy metal ions and  
264 NaCl solutions: 10 mg/L  $\text{Pb}(\text{NO}_3)_2$  and 100 mg/L NaCl solution, 10 mg/L  $\text{Fe}(\text{NO}_3)_3$  and  
265 100 mg/L NaCl solution, 10 mg/L  $\text{Ni}(\text{NO}_3)_2$  and 100 mg/L NaCl solution, 10 mg/L  
266  $\text{Cr}(\text{NO}_3)_3$  and 100 mg/L NaCl solution, 10 mg/L  $\text{Cd}(\text{NO}_3)_2$  and 100 mg/L NaCl solution,  
267 10 mg/L  $\text{Co}(\text{NO}_3)_2$  and 100 mg/L NaCl solution, 10 mg/L  $\text{Cu}(\text{NO}_3)_2$  solution and 100  
268 mg/L NaCl solution, 50 mg/L  $\text{Pb}(\text{NO}_3)_2$  and 100 mg/L NaCl solution, 50 mg/L  
269  $\text{Fe}(\text{NO}_3)_3$  and 100 mg/L NaCl solution, 50 mg/L  $\text{Ni}(\text{NO}_3)_2$  and 100 mg/L NaCl solution,  
270 50 mg/L  $\text{Cr}(\text{NO}_3)_3$  and 100 mg/L NaCl solution, 50 mg/L  $\text{Cd}(\text{NO}_3)_2$  and 100 mg/L NaCl  
271 solution, 50 mg/L  $\text{Co}(\text{NO}_3)_2$  and 100 mg/L NaCl solution, 50 mg/L  $\text{Cu}(\text{NO}_3)_2$  solution  
272 and 100 mg/L NaCl solution were configured respectively. Those solutions (65 mL)  
273 were circulated through the electrode by a peristaltic pump at the speed of 40 mL/min  
274 at 1.2 V for 120 min, respectively. The concentration of heavy metal ions in the solution  
275 after 120 min was tested by ICP-OES.

276 The capacitive removal experiments in a variety of single-component heavy metal ion  
277 solutions and the multi-component heavy metal ion solution: 10 mg/L  $\text{Pb}(\text{NO}_3)_2$ , 10  
278 mg/L  $\text{Fe}(\text{NO}_3)_3$  solution, 10 mg/L  $\text{Ni}(\text{NO}_3)_2$  solution, 10 mg/L  $\text{Co}(\text{NO}_3)_2$  solution, 10  
279 mg/L  $\text{Cu}(\text{NO}_3)_2$  solution, 10 mg/L  $\text{Cr}(\text{NO}_3)_3$  solution, 10 mg/L  $\text{Cd}(\text{NO}_3)_2$  solution; 50

280 mg/L  $\text{Pb}(\text{NO}_3)_2$ , 50 mg/L  $\text{Fe}(\text{NO}_3)_3$  solution, 50 mg/L  $\text{Ni}(\text{NO}_3)_2$  solution, 50 mg/L  
 281  $\text{Co}(\text{NO}_3)_2$  solution, 50 mg/L  $\text{Cu}(\text{NO}_3)_2$  solution, 50 mg/L  $\text{Cr}(\text{NO}_3)_3$  solution, 50 mg/L  
 282  $\text{Cd}(\text{NO}_3)_2$  solution and 10 mg/L  $\text{Pb}(\text{NO}_3)_2$ , 10 mg/L  $\text{Fe}(\text{NO}_3)_3$ , 10 mg/L  $\text{Ni}(\text{NO}_3)_2$ , 10  
 283 mg/L  $\text{Co}(\text{NO}_3)_2$ , 10 mg/L  $\text{Cu}(\text{NO}_3)_2$ , 10 mg/L  $\text{Cr}(\text{NO}_3)_3$ , 10 mg/L  $\text{Cd}(\text{NO}_3)_2$ , 100 mg/L  
 284 NaCl mixed solutions; 10 mg/L  $\text{Pb}(\text{NO}_3)_2$ , 10 mg/L  $\text{Fe}(\text{NO}_3)_3$ , 10 mg/L  $\text{Ni}(\text{NO}_3)_2$ , 10  
 285 mg/L  $\text{Co}(\text{NO}_3)_2$ , 10 mg/L  $\text{Cu}(\text{NO}_3)_2$ , 10 mg/L  $\text{Cr}(\text{NO}_3)_3$ , 10 mg/L  $\text{Cd}(\text{NO}_3)_2$ , 500 mg/L  
 286 NaCl mixed solutions; 50 mg/L  $\text{Pb}(\text{NO}_3)_2$ , 50 mg/L  $\text{Fe}(\text{NO}_3)_3$ , 50 mg/L  $\text{Ni}(\text{NO}_3)_2$ , 50  
 287 mg/L  $\text{Co}(\text{NO}_3)_2$ , 50 mg/L  $\text{Cu}(\text{NO}_3)_2$ , 50 mg/L  $\text{Cr}(\text{NO}_3)_3$ , 50 mg/L  $\text{Cd}(\text{NO}_3)_2$ , 100 mg/L  
 288 NaCl mixed solutions; 50 mg/L  $\text{Pb}(\text{NO}_3)_2$ , 50 mg/L  $\text{Fe}(\text{NO}_3)_3$ , 50 mg/L  $\text{Ni}(\text{NO}_3)_2$ , 50  
 289 mg/L  $\text{Co}(\text{NO}_3)_2$ , 50 mg/L  $\text{Cu}(\text{NO}_3)_2$ , 50 mg/L  $\text{Cr}(\text{NO}_3)_3$ , 50 mg/L  $\text{Cd}(\text{NO}_3)_2$ , 500 mg/L  
 290 NaCl mixed solutions; 10 mg/L  $\text{Pb}(\text{NO}_3)_2$ , 10 mg/L  $\text{Fe}(\text{NO}_3)_3$ , 10 mg/L  $\text{Ni}(\text{NO}_3)_2$ , 10  
 291 mg/L  $\text{Co}(\text{NO}_3)_2$ , 10 mg/L  $\text{Cu}(\text{NO}_3)_2$ , 10 mg/L  $\text{Cr}(\text{NO}_3)_3$ , 10 mg/L  $\text{Cd}(\text{NO}_3)_2$ , 20 mg/L  
 292 methyl blue solutions, 100 mg/L NaCl mixed solutions; 10 mg/L  $\text{Pb}(\text{NO}_3)_2$ , 10 mg/L  
 293  $\text{Fe}(\text{NO}_3)_3$ , 10 mg/L  $\text{Ni}(\text{NO}_3)_2$ , 10 mg/L  $\text{Co}(\text{NO}_3)_2$ , 10 mg/L  $\text{Cu}(\text{NO}_3)_2$ , 10 mg/L  
 294  $\text{Cr}(\text{NO}_3)_3$ , 10 mg/L  $\text{Cd}(\text{NO}_3)_2$ , 20 mg/L aniline solutions, 100 mg/L NaCl mixed  
 295 solutions; 10 mg/L  $\text{Pb}(\text{NO}_3)_2$ , 10 mg/L  $\text{Fe}(\text{NO}_3)_3$ , 10 mg/L  $\text{Ni}(\text{NO}_3)_2$ , 10 mg/L  
 296  $\text{Co}(\text{NO}_3)_2$ , 10 mg/L  $\text{Cu}(\text{NO}_3)_2$ , 10 mg/L  $\text{Cr}(\text{NO}_3)_3$ , 10 mg/L  $\text{Cd}(\text{NO}_3)_2$ , 100 mg/L  $\text{CaCl}_2$   
 297 mixed solutions; 10 mg/L  $\text{Pb}(\text{NO}_3)_2$ , 10 mg/L  $\text{Fe}(\text{NO}_3)_3$ , 10 mg/L  $\text{Ni}(\text{NO}_3)_2$ , 10 mg/L  
 298  $\text{Co}(\text{NO}_3)_2$ , 10 mg/L  $\text{Cu}(\text{NO}_3)_2$ , 10 mg/L  $\text{Cr}(\text{NO}_3)_3$ , 10 mg/L  $\text{Cd}(\text{NO}_3)_2$ , 500 mg/L  $\text{CaCl}_2$   
 299 mixed solutions were configured respectively.

Those solution (65 mL) were circulated through the electrode by a peristaltic pump at the speed of 40 mL/min at 1.2 V for 120 min, respectively. The concentration of heavy metal ions in the solution after 120 min was measured by ICP-OES.

An asymmetric capacitive deionization (CDI) system was used to explore the ability of  $W_{18}O_{49}$ /Graphene electrode to adsorb sodium ions in the NaCl solutions. In the asymmetric capacitive deionization system,  $W_{18}O_{49}$ /Graphene and  $W_{18}O_{49}$ /C materials were used as the cathode and AC as the anode. In contrast, AC was used as both the cathode and the anode in a symmetric capacitive deionization system. The asymmetric  $W_{18}O_{49}$ /Graphene||AC,  $W_{18}O_{49}$ /C||AC and the symmetric AC||AC were first tested in a 1000 mg/L NaCl solution at 1.2 V. The results show that  $W_{18}O_{49}$ /Graphene has the largest salt adsorption capacity (SAC) which is up to 78 mg/g (Figure S18). This is because the layered structure of  $W_{18}O_{49}$ /Graphene can provide a fast channel for ion transfer from the electrolyte, which is helpful to improve the ion implantation ability. The SAC of  $W_{18}O_{49}$ /Graphene electrode has reached a higher level compared with many reported values in literature (Table S4). Furthermore, the desalination ability of  $W_{18}O_{49}$ /Graphene electrode is studied at different voltages in the 1000 mg/L NaCl solution (Figure S19). The results show that the  $W_{18}O_{49}$ /Graphene electrode can obtain a higher SAC at 1.2 V. Meanwhile, the SAC of  $W_{18}O_{49}$ /Graphene electrode increases with the increase of NaCl concentration (Figure S20). In addition, the salt adsorption rate is also used to measure the desalination performance of the electrode in different concentration NaCl solutions. The  $W_{18}O_{49}$ /Graphene electrode has a higher salt adsorption rate than other electrodes in the 1000 mg/L NaCl solutions (Figure S21-22).

322 The corresponding maximum salt adsorption rate of the  $W_{18}O_{49}$ /Graphene electrode is  
323 0.22 mg/g/s in a 1000 mg/L NaCl solution at a constant voltage of 1.2 V. At the same  
324 time, the average salt adsorption rate is 0.032 mg/g/s. The high desalting ability and  
325 fast salt adsorption rate are mainly attributed to the electro-adsorption behavior of the  
326 electrode. From the Ragone curve, it can be seen that the increase of concentration will  
327 make the curve shift to the upper right corner, which indicates that salt adsorption rate  
328 (SAR) and SAC increase with the increase of concentration (Figure S23-24). The  
329  $W_{18}O_{49}$ /Graphene electrode also showed the higher charge efficiency than other  
330 electrodes in different NaCl solutions at a constant voltage of 1.2 V (Figure S25). The  
331 charge efficiency of  $W_{18}O_{49}$ /Graphene electrode can be maintained at 84%~90% in  
332 100~1000 mg/L NaCl solutions at a constant voltage of 1.2 V. The specific energy  
333 consumption ( $SEC^{-1}$ ) of the electrodes was observed. It displayed an intrinsic trade-off  
334 between  $SEC^{-1}$  and SAR. The  $W_{18}O_{49}$ /Graphene electrode had the highest salt  
335 adsorption rate in the same energy consumption in the 1000 mg/L NaCl solution,  
336 indicating that the electrode could absorb more ions at the same energy consumption  
337 (Figure S26-27). At the same time, the energy consumption of  $W_{18}O_{49}$ /Graphene  
338 electrode is reduced to 0.34 Wh  $g^{-1}$  in a 1000 mg/L NaCl solution at a constant voltage  
339 of 1.2 V, which is lower than that of traditional capacitive deionization (0.37-3.8 Wh  $g^{-1}$ )<sup>10</sup>. The energy efficiency of the  $W_{18}O_{49}$ /Graphene can also reach 30% in a 1000 mg/L  
340 NaCl solution at a constant voltage of 1.2 V.



342

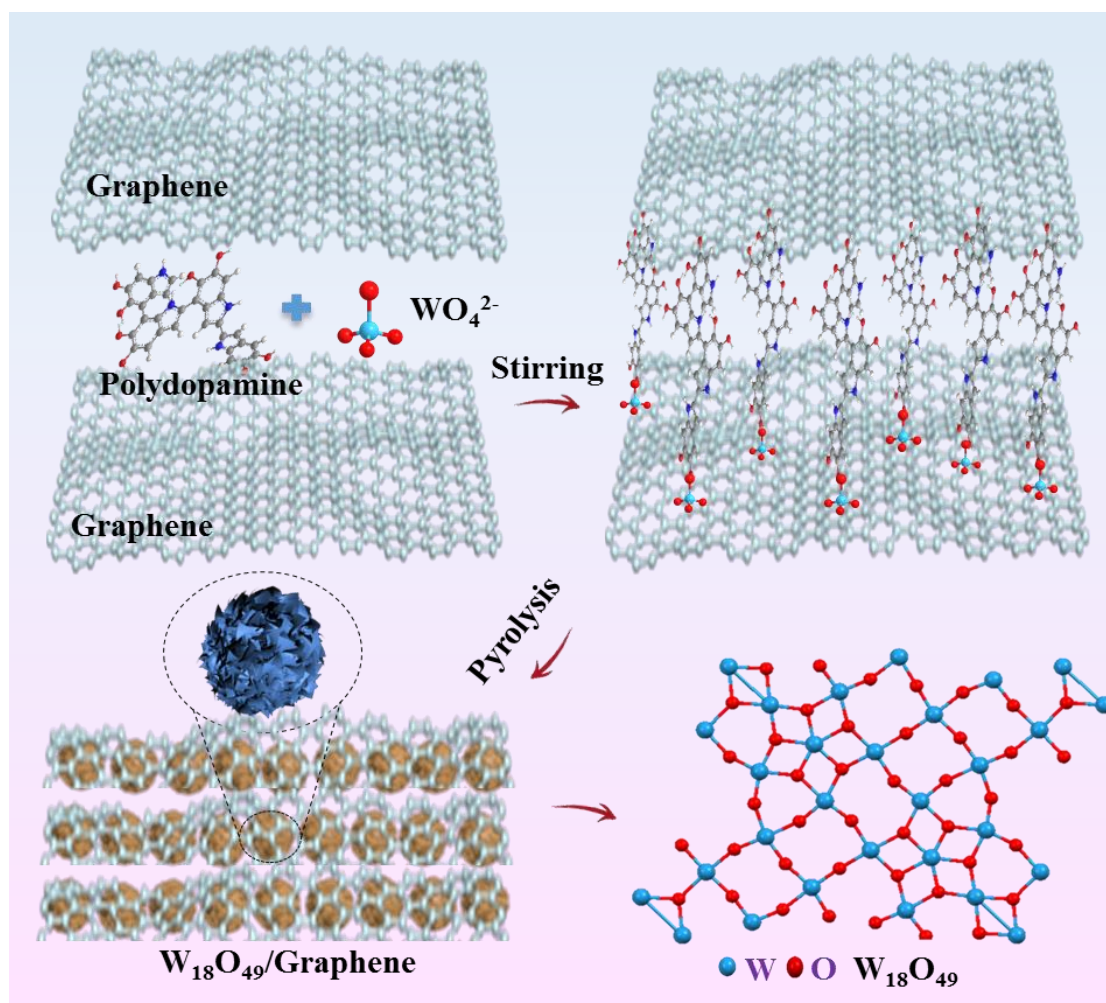

343

344

Figure S1. Schematic illustration of the synthesis route of the  $W_{18}O_{49}/Graphene$ .

345

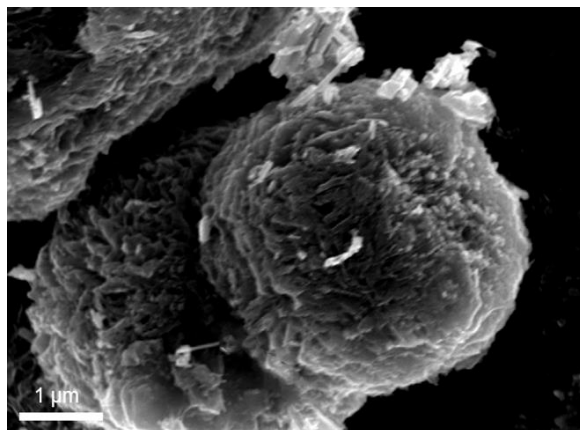

Figure S2. SEM image of the  $W_{18}O_{49}/C$ .

349

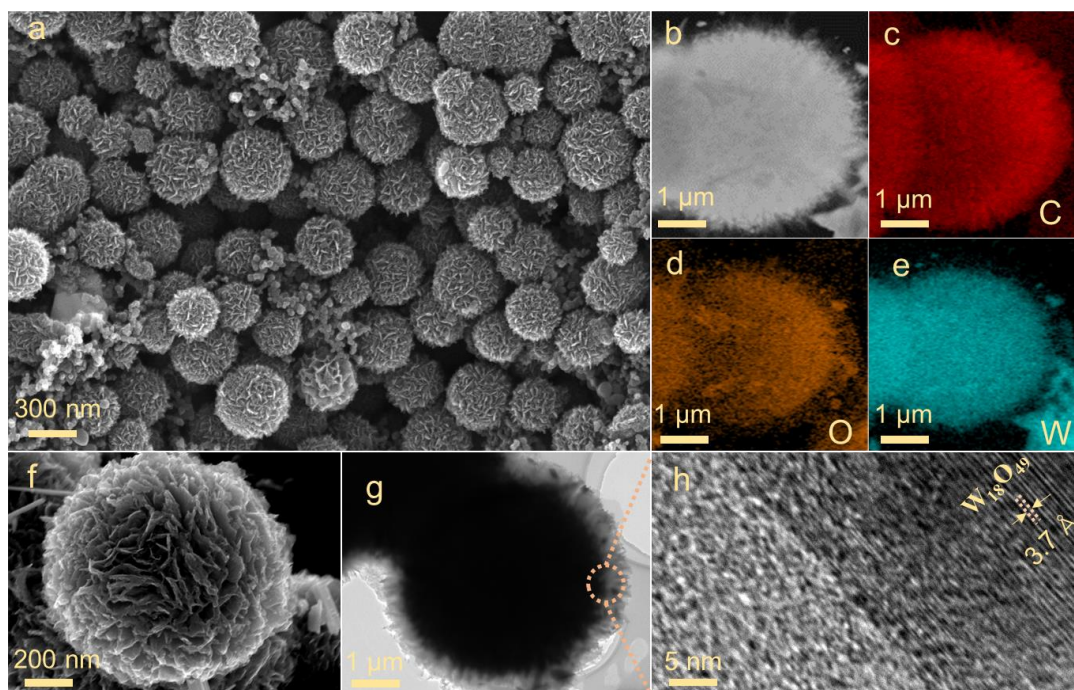

350

351 Figure S3. (a) SEM image, (b-e) EDS mapping, (f) SEM image, (g) TEM image and (h)

352 HRTEM image of the  $W_{18}O_{49}$ /Graphene.

353

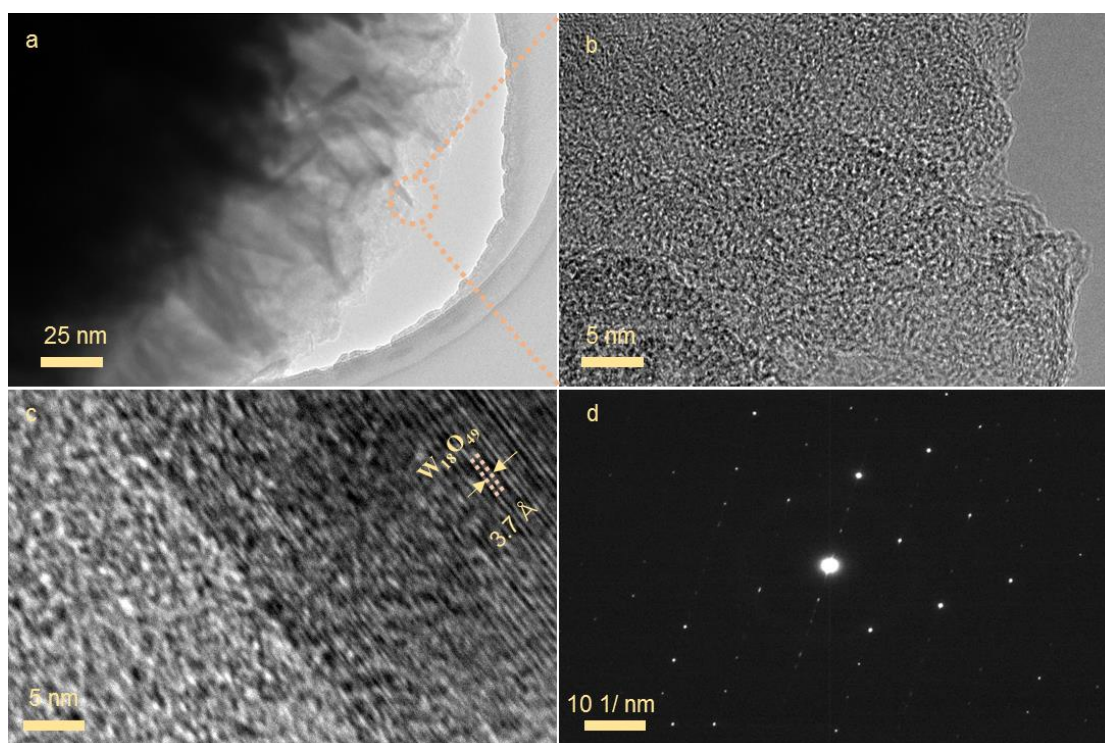

Figure S4. (a) TEM image, (b, c) HRTEM and (d) SAED patterns of the  $W_{18}O_{49}/\text{Graphene}$ .

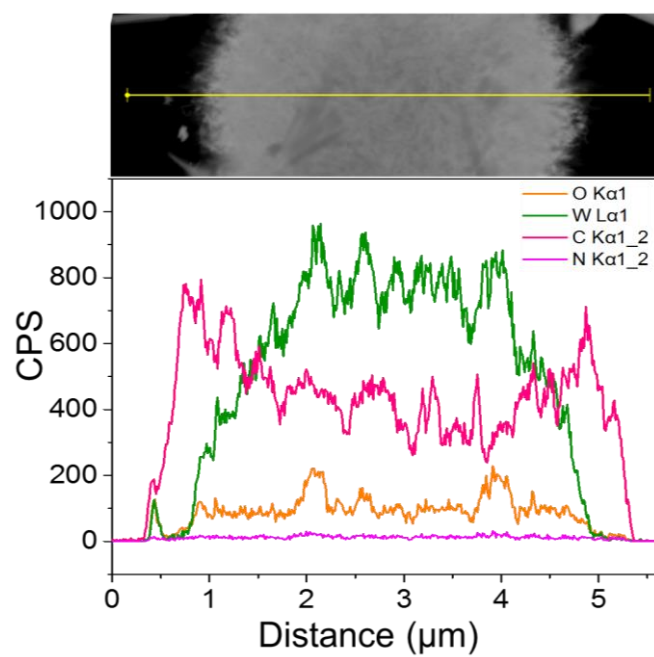

Figure S5. EDS line scans of the  $W_{18}O_{49}$ /Graphene.

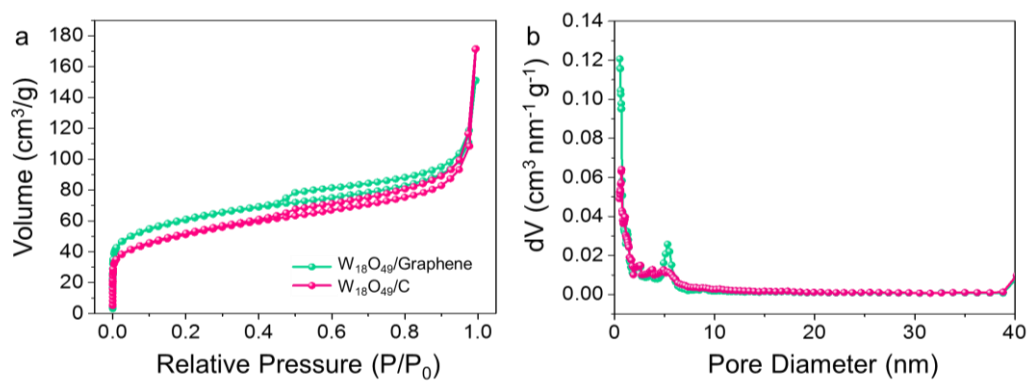

Figure S6. (a) Nitrogen sorption isotherms of the W<sub>18</sub>O<sub>49</sub>/Graphene and W<sub>18</sub>O<sub>49</sub>/C. (b) DFT pore size distribution curves of the W<sub>18</sub>O<sub>49</sub>/Graphene and W<sub>18</sub>O<sub>49</sub>/C.



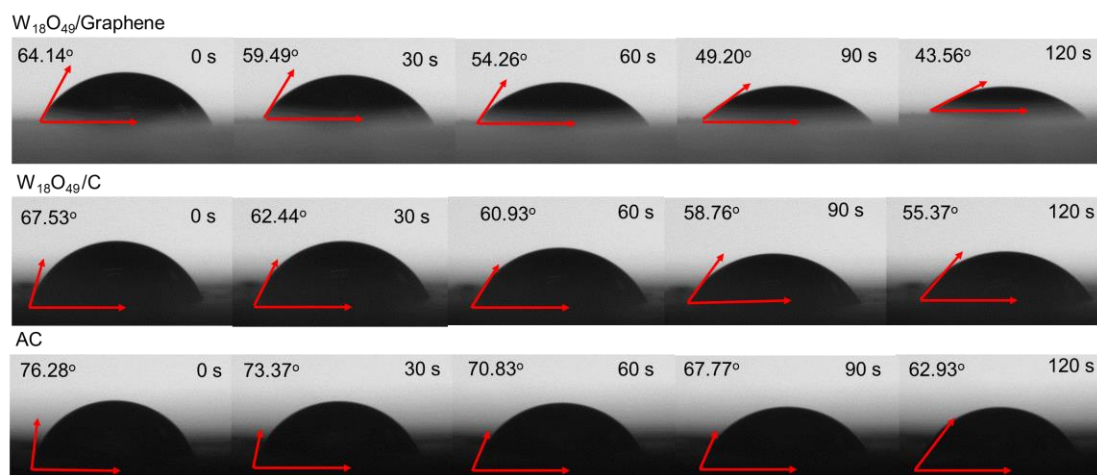

Figure S7. Dynamic water contact angle analysis of the  $W_{18}O_{49}/\text{Graphene}$ ,  $W_{18}O_{49}/C$  and AC.

369

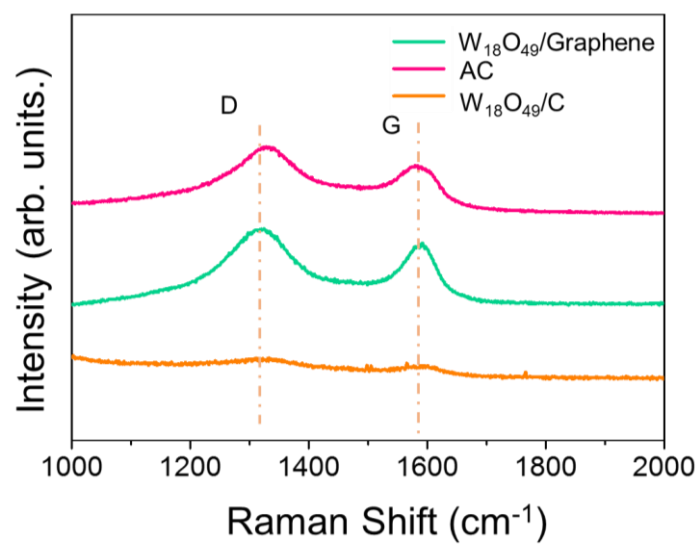

370

371 Figure S8. Raman spectra of the W<sub>18</sub>O<sub>49</sub>/Graphene, W<sub>18</sub>O<sub>49</sub>/C and AC.

372



373

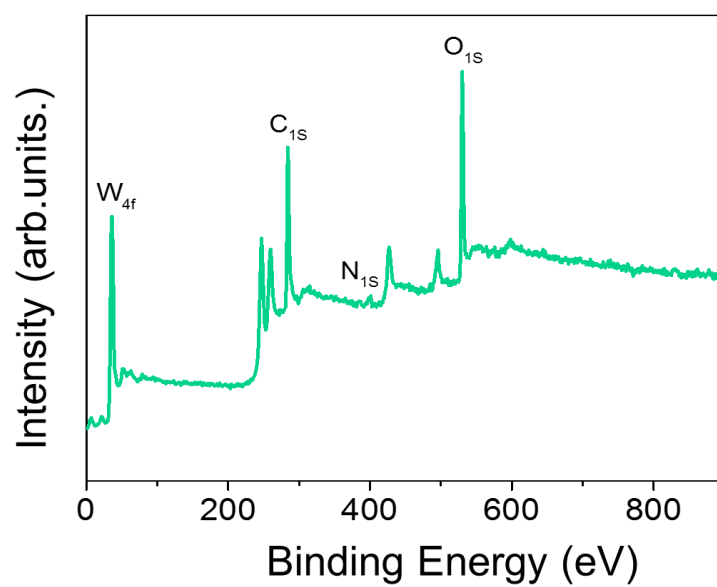

374

375

Figure S9. XPS spectra of the W<sub>18</sub>O<sub>49</sub>/Graphene.

376

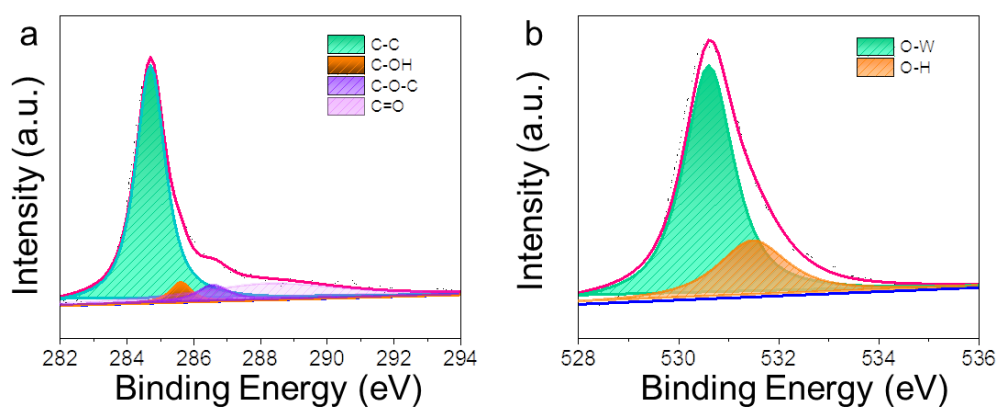

Figure S10. (a) C 1s and (b) O 1s spectra of the  $W_{18}O_{49}$ /Graphene.

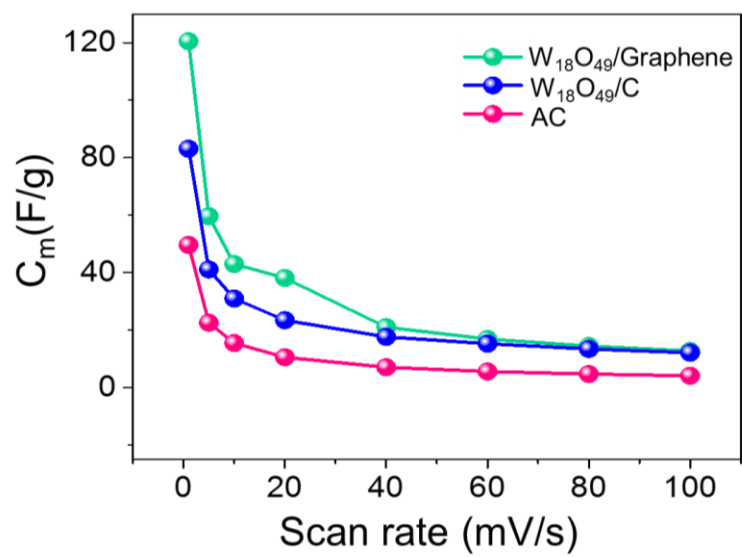

380

381 Figure S11. Plots of specific capacitance *versus* scanning rates for  $W_{18}O_{49}/\text{Graphene}$ ,

382  $W_{18}O_{49}/C$ , and AC in a 1000 mg/L NaCl solution.

383

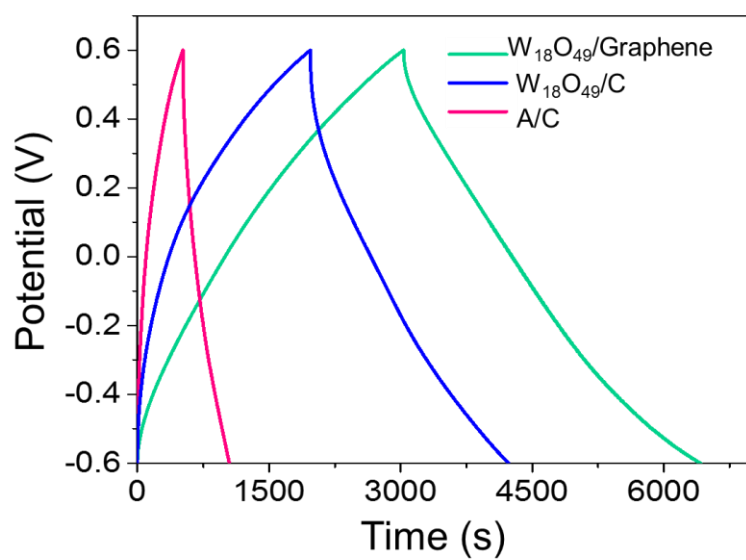

384

385 Figure S12. Charge-discharge curves of  $W_{18}O_{49}/\text{Graphene}$ ,  $W_{18}O_{49}/C$ , and AC at 0.2

386 A/g in a 1000 mg/L NaCl solution.

387

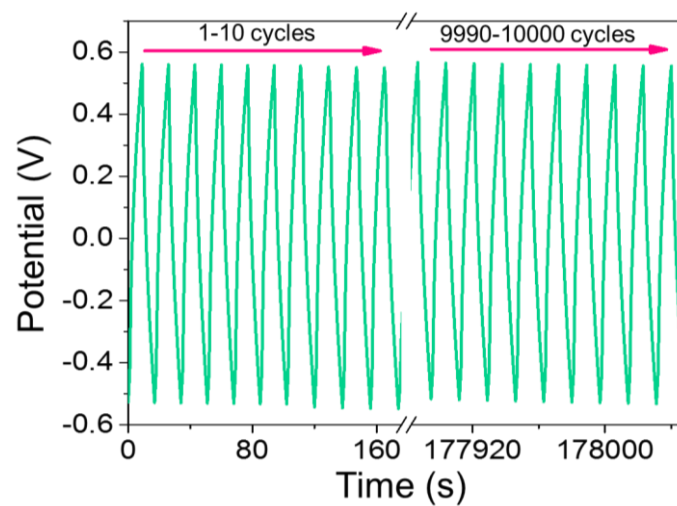

388

389 Figure S13. Cycle stability plots of the  $W_{18}O_{49}$ /Graphene electrode at 10 A/g in a 1000

390 mg/L NaCl solution.

391

392

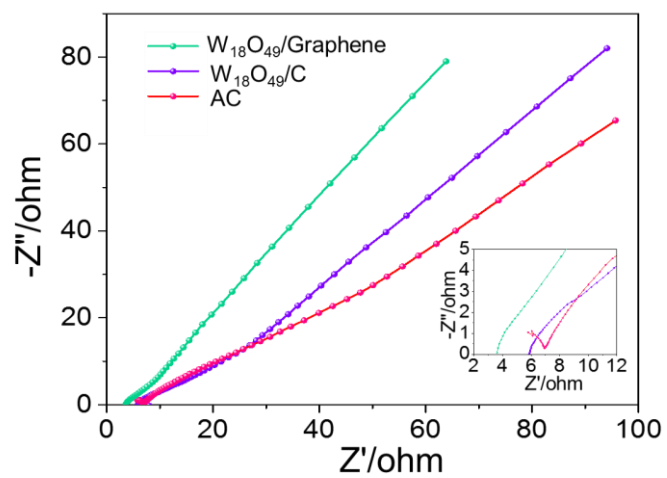

393

394 Figure S14. Impedance spectra of W<sub>18</sub>O<sub>49</sub>/Graphene, W<sub>18</sub>O<sub>49</sub>/C, and AC in a 1000 mg/L

395 NaCl solution.

396

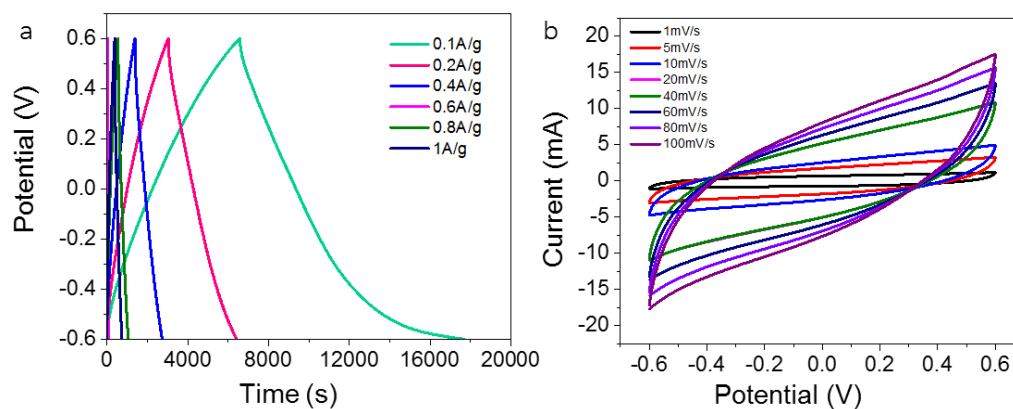

397

398 Figure S15. (a) Charge-discharge curves of the  $W_{18}O_{49}$ /Graphene electrodes in a 1000

399 mg/L NaCl solution. (b) CV curves of the  $W_{18}O_{49}$ /Graphene electrodes in a 1000 mg/L

400 NaCl solution.

401

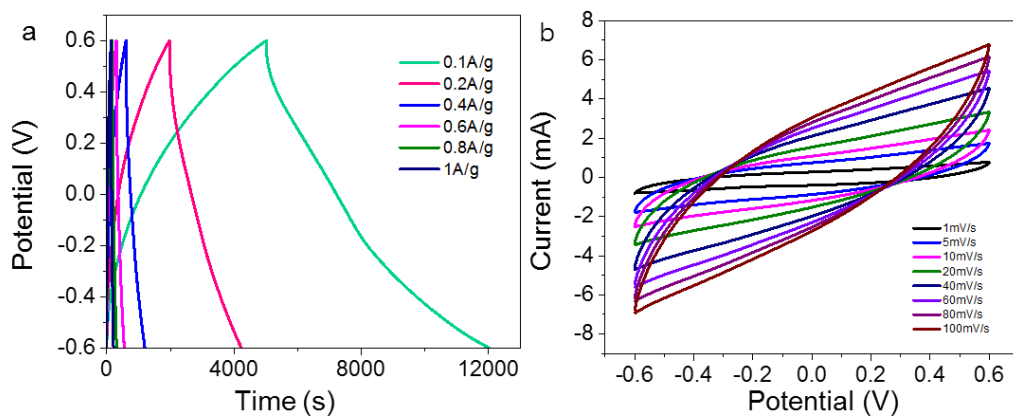

Figure S16. (a) Charge-discharge curves of the  $W_{18}O_{49}/C$  electrodes in a 1000 mg/L NaCl solution. (b) CV curves of the  $W_{18}O_{49}/C$  electrodes in a 1000 mg/L NaCl solution.



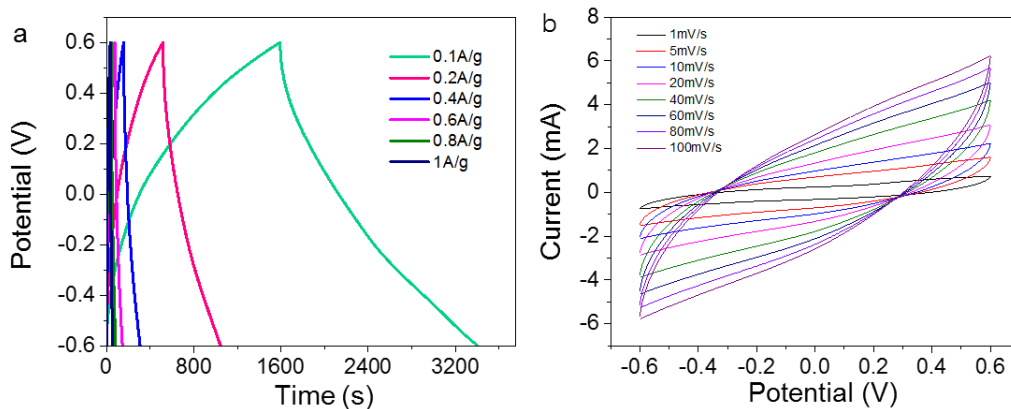

Figure S17. (a) Charge-discharge curves of the AC electrodes in a 1000 mg/L NaCl solution. (b) CV curves of the AC electrodes in a 1000 mg/L NaCl solution.

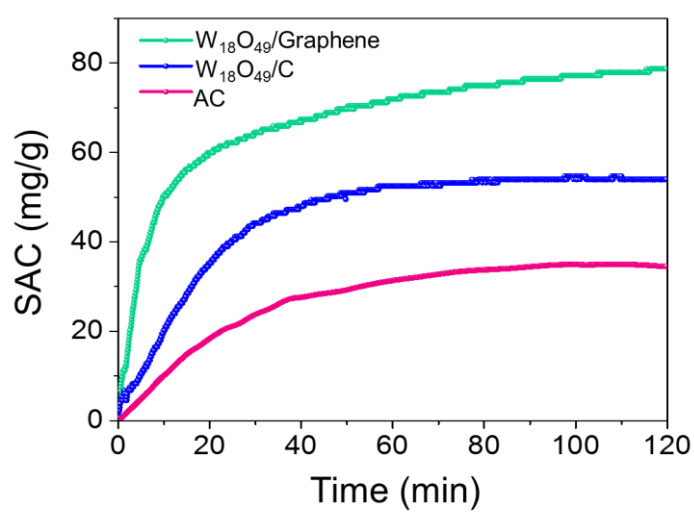

410

411 Figure S18. Plots of salt adsorption capacity of  $W_{18}O_{49}/\text{Graphene}$ ,  $W_{18}O_{49}/C$  and AC

412 *versus* time in a 1000 mg/L NaCl solution at 1.2 V.

413

414

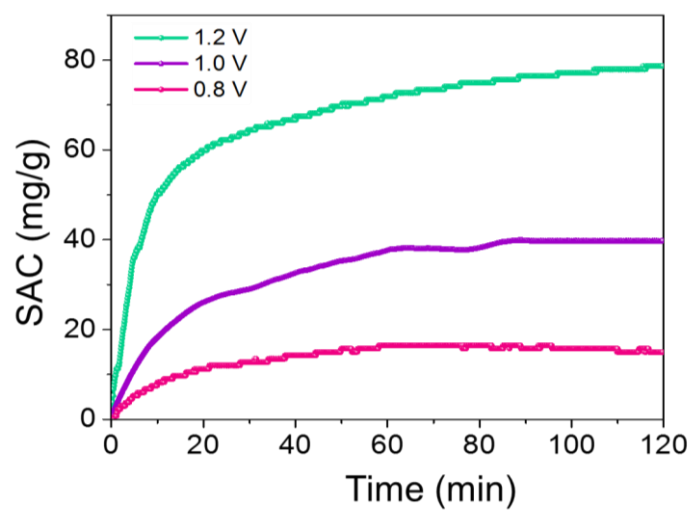

415

416 Figure S19. Plots of salt adsorption capacity of  $W_{18}O_{49}/\text{Graphene}$  *versus* time in a 1000  
417 mg/L NaCl solution at different voltages.

418

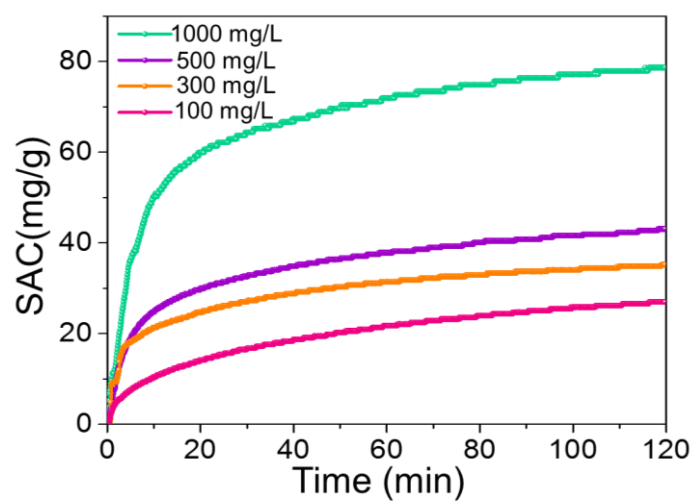

419

420 Figure S20. Plots of salt adsorption capacity of  $W_{18}O_{49}/\text{Graphene}$  *versus* time in

421 different concentrations of NaCl solutions at 1.2 V.

422

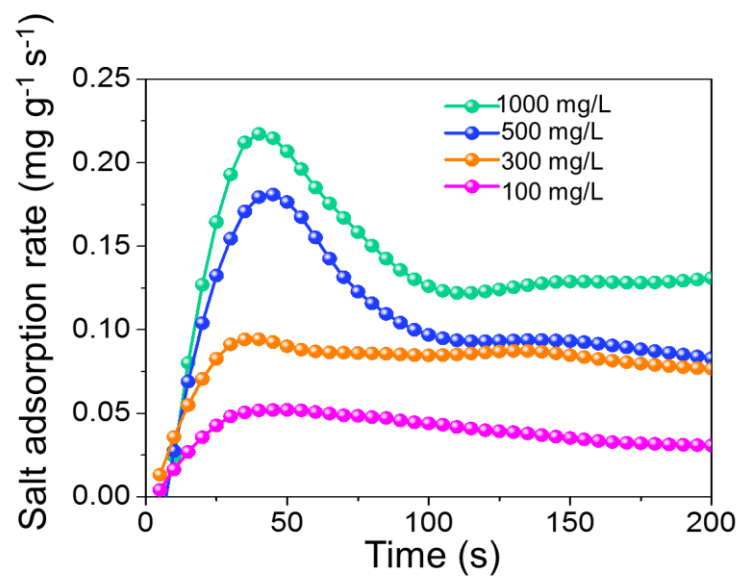

423

424 Figure S21. Plots of salt adsorption rate of W<sub>18</sub>O<sub>49</sub>/Graphene *versus* time in different

425 concentrations of NaCl solutions.

426

427

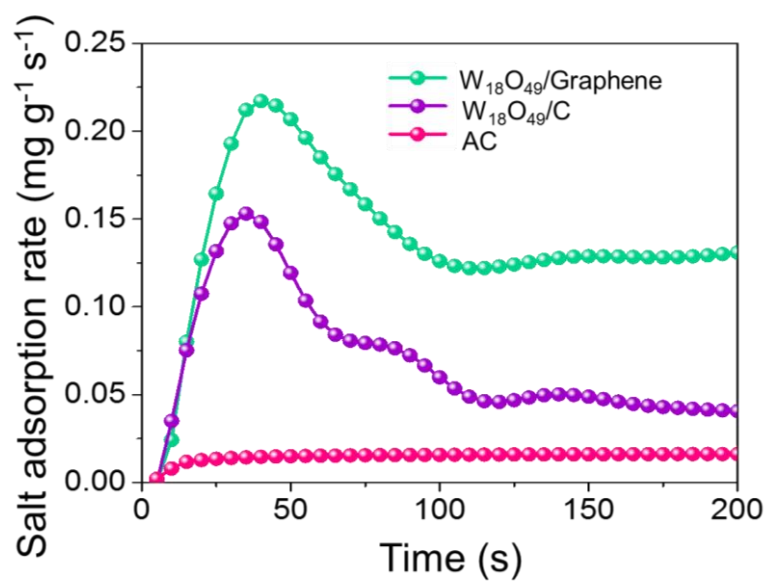

428

429 Figure S22. Plots of salt adsorption rate of W<sub>18</sub>O<sub>49</sub>/Graphene, W<sub>18</sub>O<sub>49</sub>/C and AC *versus*

430 time in a 1000 mg/L NaCl solution at 1.2 V.

431

432

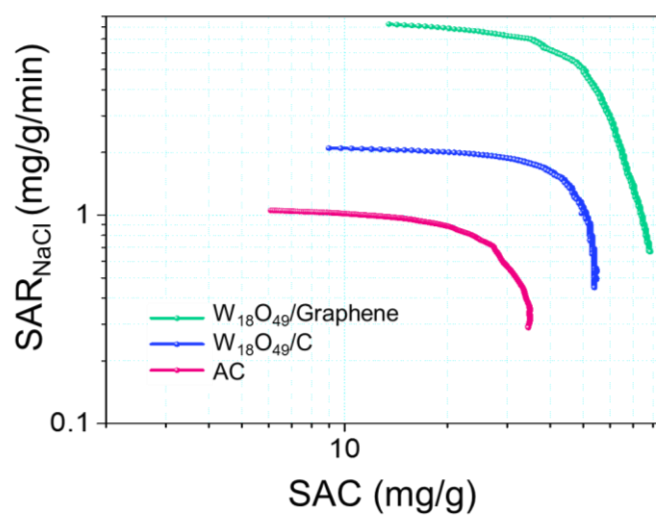

433

434 Figure S23. Ragone plots of SAR *versus* SAC of W<sub>18</sub>O<sub>49</sub>/Graphene, W<sub>18</sub>O<sub>49</sub>/C and AC

435 time in a 1000 mg/L NaCl solution at 1.2 V.

436

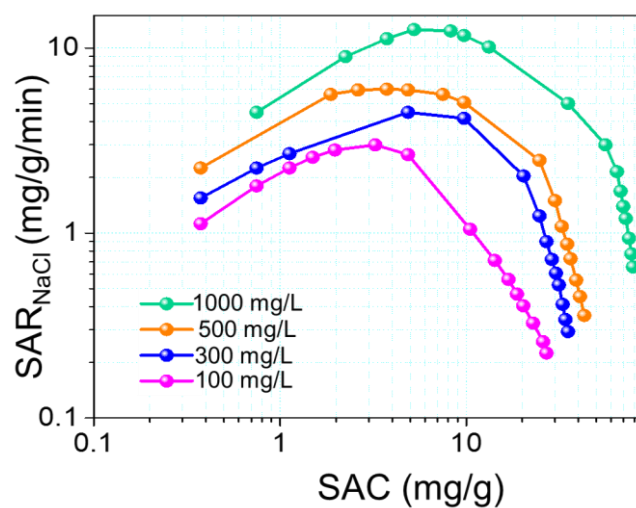

437

438 Figure S24. Ragone plots of  $SAR$  versus  $SAC$  of  $W_{18}O_{49}/Graphene$  in different

439 concentrations of NaCl solutions.

440



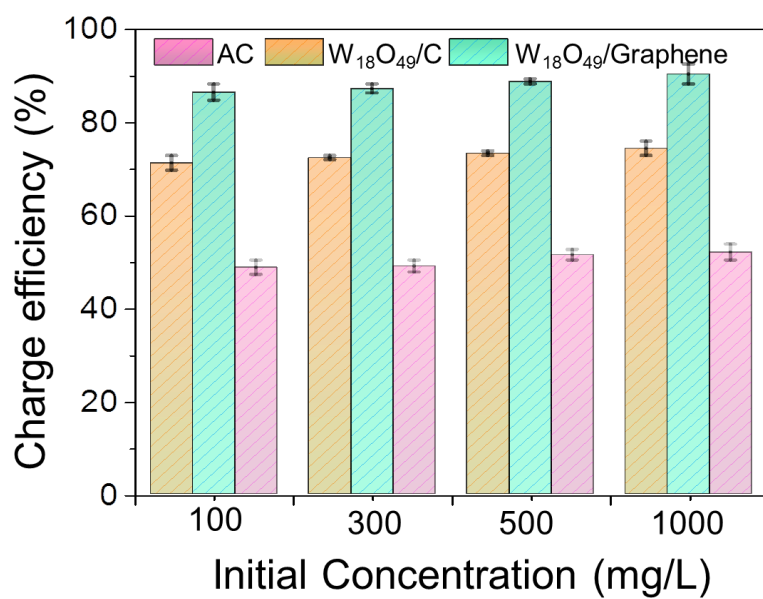

441

442 Figure S25. Plots of charge efficiency of  $W_{18}O_{49}/\text{Graphene}$ ,  $W_{18}O_{49}/C$  and AC in

443 different concentrations of NaCl solutions at 1.2 V.

444

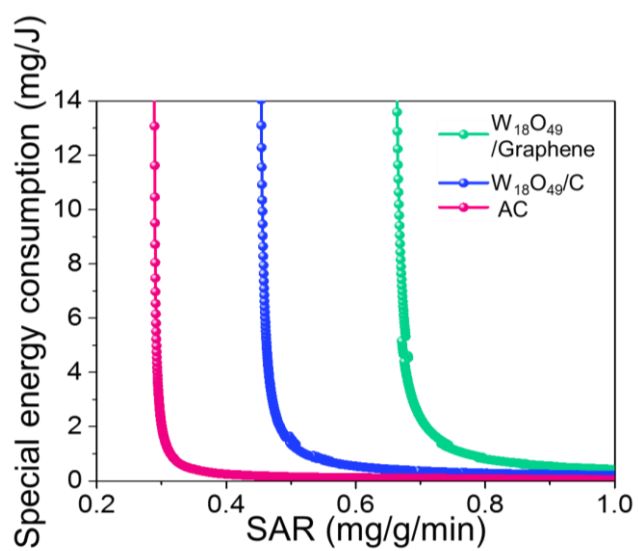

Figure S26. Plots of specific energy consumption of the W<sub>18</sub>O<sub>49</sub>/Graphene, W<sub>18</sub>O<sub>49</sub>/C and AC electrode *versus* SAR in a 1000 mg/L NaCl solution at 1.2 V.

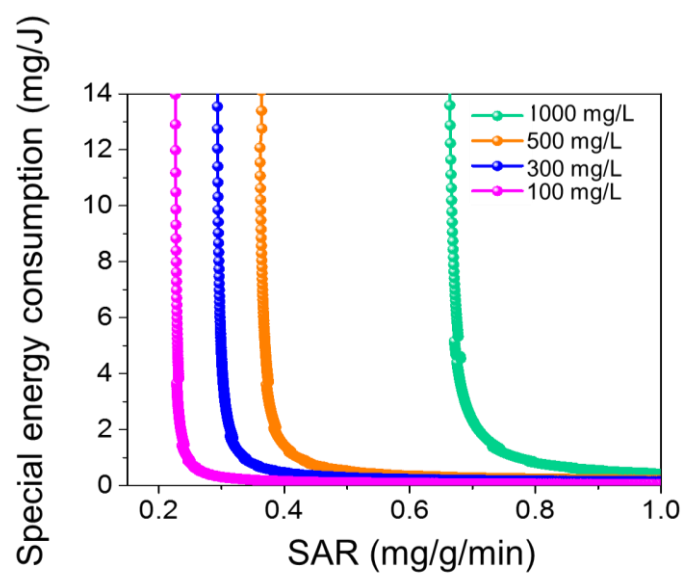

449

450 Figure S27. Plots of specific energy consumption of the  $W_{18}O_{49}$ /Graphene *versus* SAR

451 in different concentrations of NaCl solutions.

452

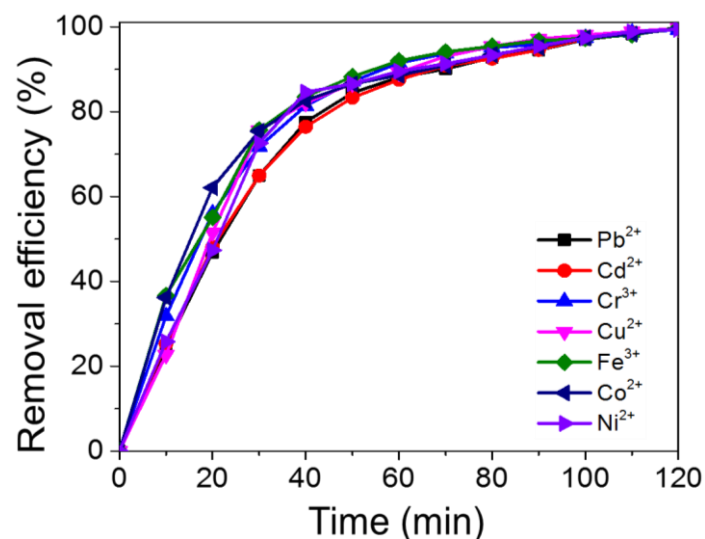

Figure S28. Plots of removal efficiency of heavy metal ions with the  $W_{18}O_{49}$ /Graphene electrode *versus* different times in the multi-component solution containing all the seven metal nitrates (10 mg/L for each) and NaCl (100 mg/L) at 1.2 V.

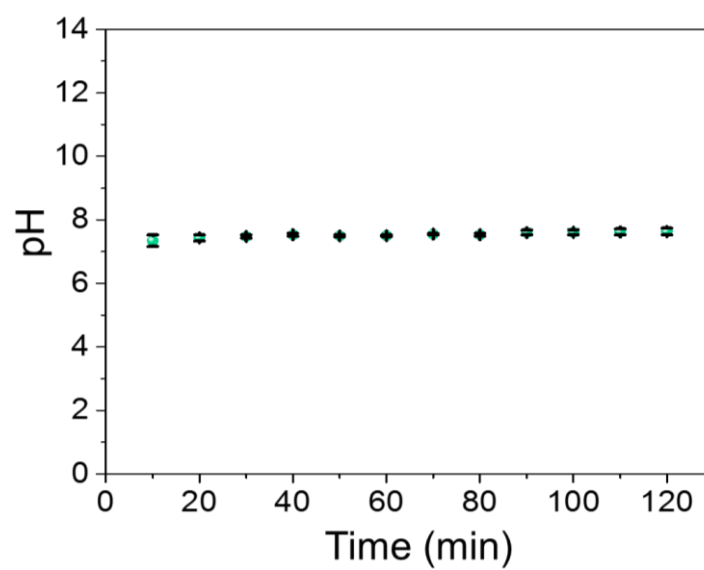

458

459 Figure S29. Plot of pH value *versus* deionization time of  $W_{18}O_{49}$ /Graphene in the multi-

460 component solution containing all the seven metal nitrates (10 mg/L for each) and 100

461 mg/L NaCl at 1.2 V.

462

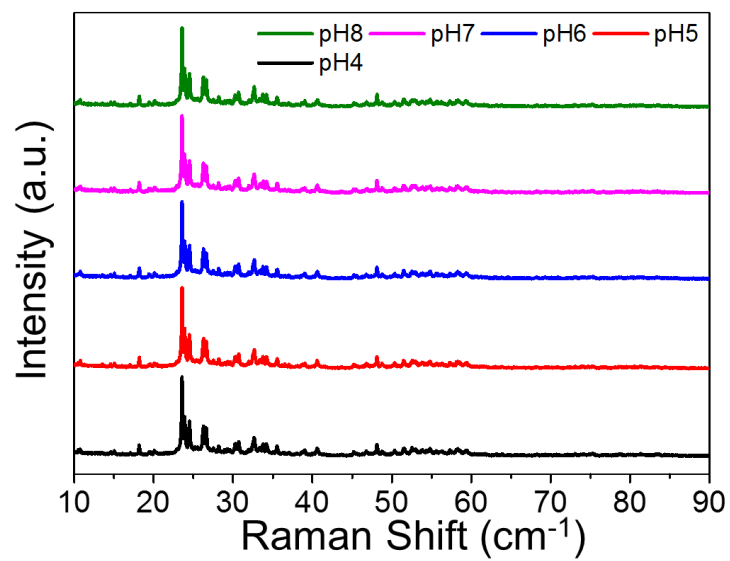

Figure S30. XRD patterns of materials after soaking in solutions with different pH values.

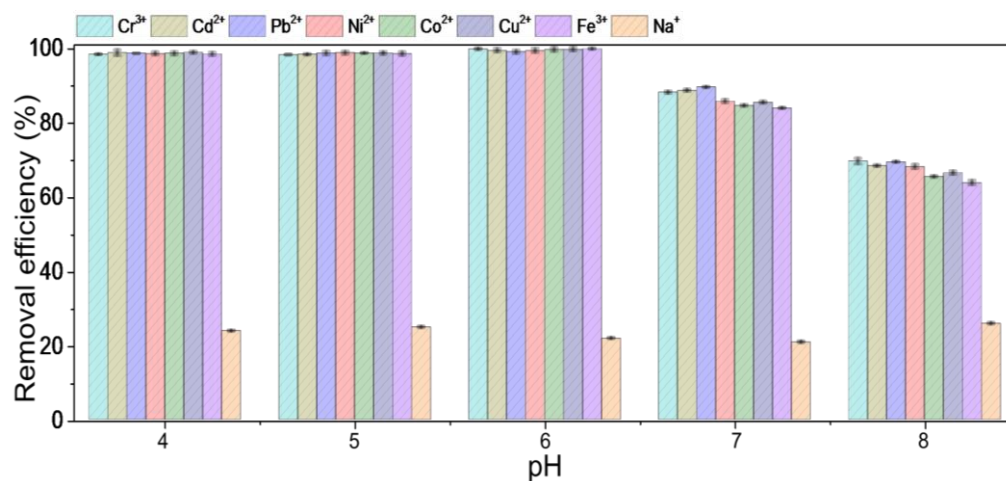

467 Figure S31. Plots of removal efficiency of heavy metal ion *versus* pH values in the  
 468 multi-component solution containing all the seven metal nitrates (10 mg/L for each)  
 469 and 100 mg/L NaCl at 1.2 V.  
 470

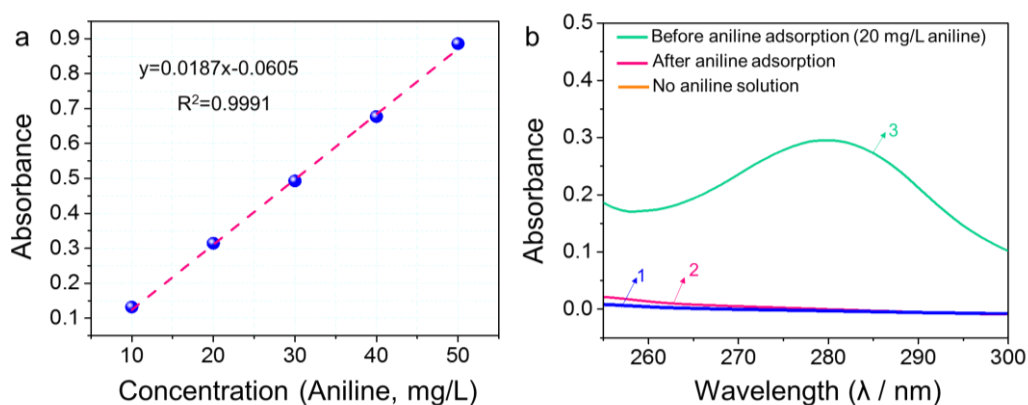

Figure S32. (a) Plots of absorbance *versus* aniline concentration. (b) Absorbance curves in the multi-component solution containing all the seven metal nitrates (10 mg/L for each) and 100 mg/L NaCl (Line 1). Absorbance curves after aniline adsorption in the multi-component solution containing all the seven metal nitrates (10 mg/L for each), 20 mg/L aniline and 100 mg/L NaCl (Line 2). Absorbance curves before aniline adsorption in the multi-component solution containing all the seven metal nitrates (10 mg/L for each), 20 mg/L aniline and 100 mg/L NaCl (Line 3).



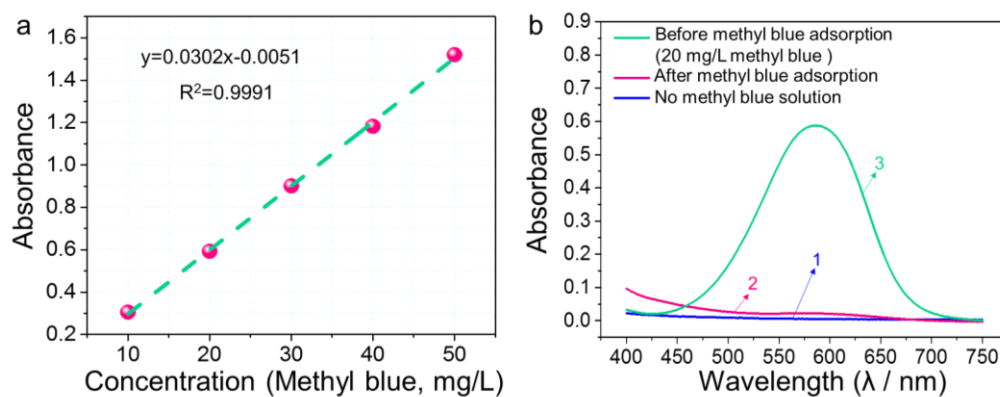

Figure S33. (a) Plots of absorbance *versus* methyl blue concentration. (b) Absorbance curves in the multi-component solution containing all the seven metal nitrates (10 mg/L for each) and 100 mg/L NaCl (Line 1). Absorbance curves after methyl blue adsorption in the multi-component solution containing all the seven metal nitrates (10 mg/L for each), 20 mg/L aniline and 100 mg/L NaCl (Line 2). Absorbance curves before methyl blue adsorption in the multi-component solution containing all the seven metal nitrates (10 mg/L for each), 20 mg/L methyl blue and 100 mg/L NaCl (Line 3).

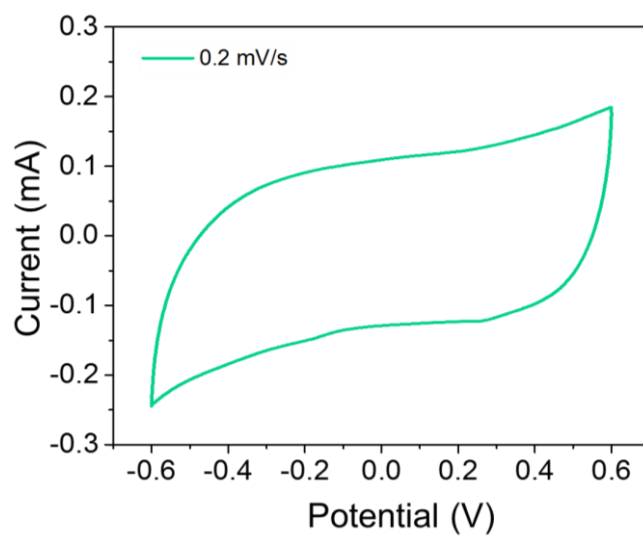

489

490 Figure S34. CV curves of the  $\text{W}_{18}\text{O}_{49}$ /Graphene electrodes at 0.2 mV/s in 100 mg/L

491  $\text{CaCl}_2$  at a constant voltage of 1.2 V.

492

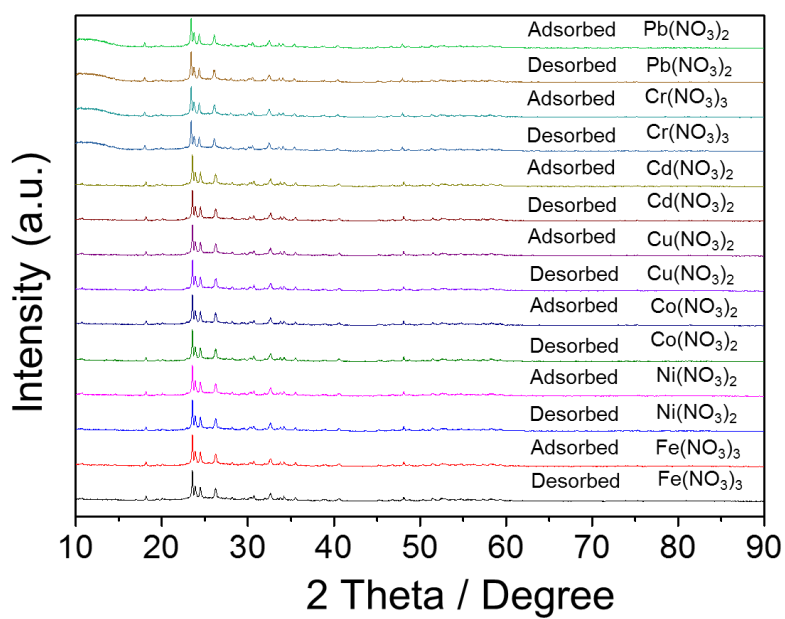

Figure S35. XRD patterns of  $W_{18}O_{49}$ /Graphene before and after heavy metal ion adsorption in single-component metal nitrate solution solutions (metal nitrate (10 mg/L)).

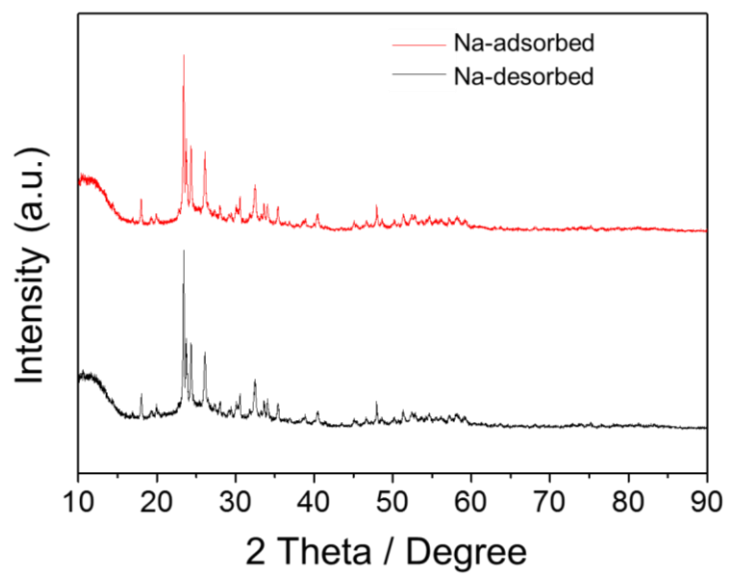

497

498 Figure S36. XRD patterns of  $W_{18}O_{49}$ /Graphene after Na-adsorbed and Na-desorbed in

499 100 mg/L NaCl solutions.

500

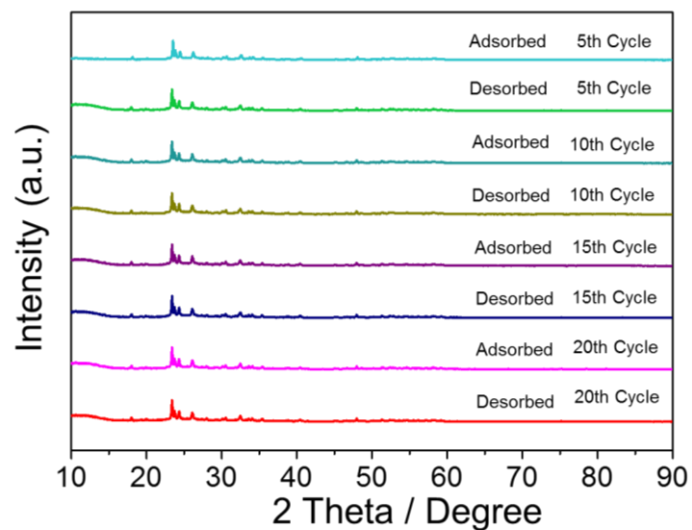

501

502 Figure S37. XRD patterns of  $W_{18}O_{49}$ /Graphene before and after heavy metal ion

503 adsorption in the multi-component solution containing all the seven metal nitrates (10

504 mg/L for each) and 100 mg/L NaCl at a constant voltage of 1.2 V.

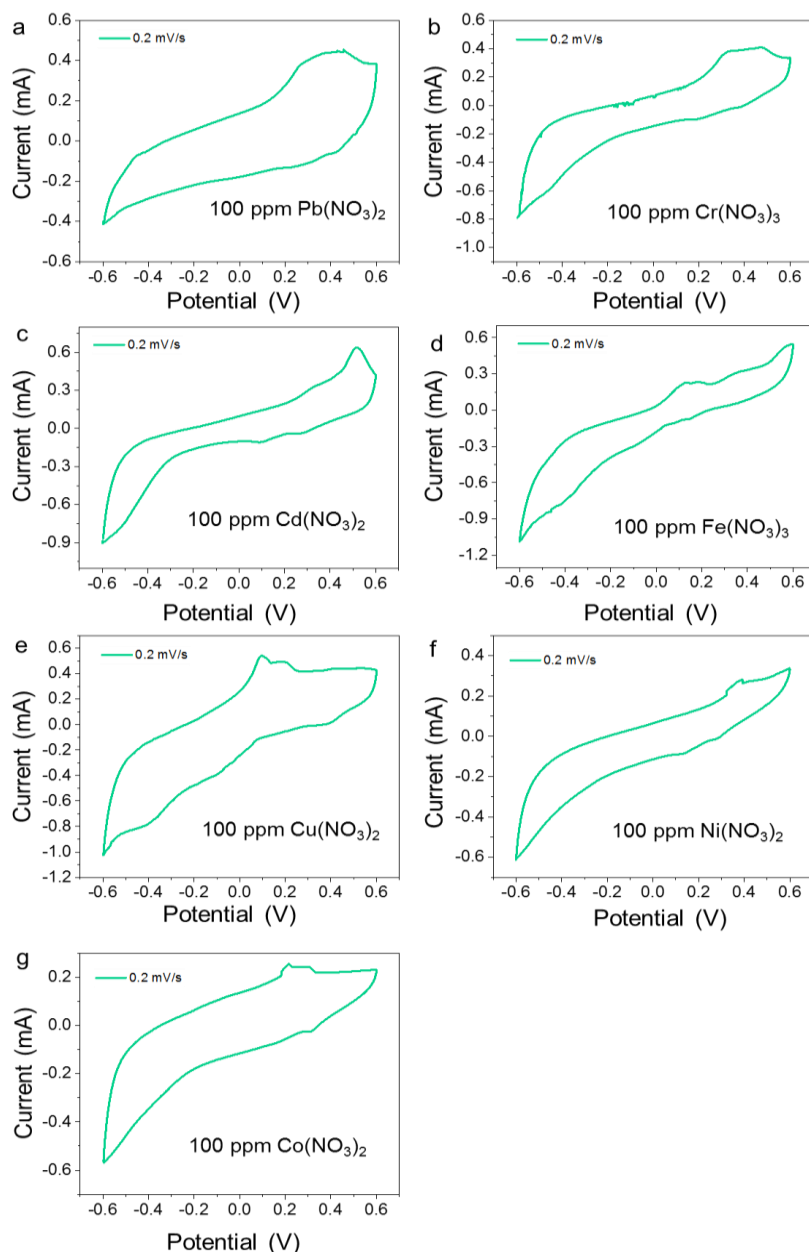

Figure S38. (a) CV curves at a scanning rate of 0.2 mV/s in 100 mg/L  $\text{Pb}(\text{NO}_3)_2$  solutions, (b) CV curves at a scanning rate of 0.2 mV/s in 100 mg/L  $\text{Cr}(\text{NO}_3)_3$  solutions, (c) CV curves at a scanning rate of 0.2 mV/s in 100 mg/L  $\text{Cd}(\text{NO}_3)_2$  solutions, (d) CV curves at a scanning rate of 0.2 mV/s in 100 mg/L  $\text{Fe}(\text{NO}_3)_3$  solutions, (e) CV curves at a scanning rate of 0.2 mV/s in 100 mg/L  $\text{Cu}(\text{NO}_3)_2$  solutions, (f) CV curves at a scanning rate of 0.2 mV/s in 100 mg/L  $\text{Ni}(\text{NO}_3)_2$  solutions, (g) CV curves at a scanning rate of 0.2 mV/s in 100 mg/L  $\text{Co}(\text{NO}_3)_2$  solutions.

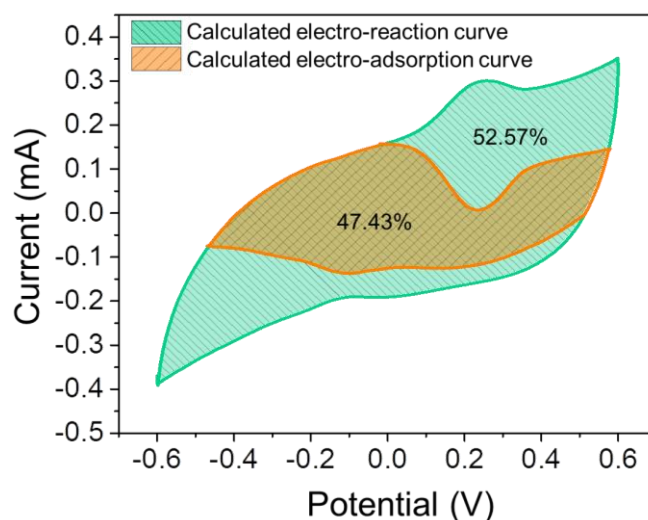

Figure S39. CV curves at a scanning rate of 0.2 mV/s in the multi-component solution containing all the seven metal nitrates (10 mg/L for each) and 100 mg/L NaCl.

The proportion of contribution of electro-adsorption and electro-reaction were calculated according to the Eq (12).<sup>11</sup>

$$i(V) = k_1 v + k_2 v^{0.5} \dots \dots \dots (12)$$

where the  $i$  is the current (A), the  $v$  is the scanning rate (mV/s),  $k_1$  and  $k_2$  are constant values at a fixed potential.  $k_1 v$  is related to the capacitive current raised from electro-adsorption and  $k_2 v^{0.5}$  is related to electro-reaction.

CV curves at 0.2 and 0.5 mV/s have been measured, respectively. Based on the Eq (12), at a given potential  $P$ , two known different current values  $i_1$  and  $i_2$  are obtained at two scanning rates  $v_1$  (0.2 mV/s) and  $v_2$  (0.5 mV/s), thus obtaining a binary equations as follow:<sup>11</sup>

$$i_1(P) = 0.2 k_1 + \sqrt{0.2} k_2 \dots \dots \dots (13)$$

$$i_2(P) = 0.5 k_1 + \sqrt{0.5} k_2 \dots \dots \dots (14)$$

$k_1$  and  $k_2$  at  $P$  potential can be obtained by solving the abovementioned binary equations consisting Eq (13) and Eq (14). A CV cycle contains a series of potential

values, so a series of  $k_1$  and  $k_2$  values can be obtained. For the same material,  $k_1$  and  $k_2$  are fixed at a given potential. Therefore, at the scanning rate of 0.2 mV/s, the current derived from electro-adsorption can be obtained by the Eq (15).<sup>11</sup>

$$i_{\text{electro-adsorption}}(V) = 0.2 k_1 \dots \dots \dots (15)$$

Where  $i_{\text{electro-adsorption}}$  is the current derived from the electro-adsorption. These  $i_{\text{electro-adsorption}}$  points can be linked to form a closed CV curve, which is the shaded part in Figure S39. The area of shaded part as a percentage of the area of the measured CV curve is the percentage of the contribution of the electro-adsorption. The rest is the electro-reaction contribution. The yellow shadow area is corresponding to the contribution of the electro-adsorption at 0.2 mV/s (Figure S39), which takes a proportion of 47.43%. The result demonstrates that electro-adsorption contributes 47.43% and the electro-reaction contributes 52.57%.



Table S1. Summary of properties of the materials.

| Materials                                 | $S_{\text{BET}}^{\text{a}}$<br>[m <sup>2</sup> g <sup>-1</sup> ] | $V_{\text{total}}^{\text{b}}$<br>[cm <sup>3</sup> g <sup>-1</sup> ] | $V_{\text{Micropore}}^{\text{c}}$<br>[cm <sup>3</sup> g <sup>-1</sup> ] | $V_{\text{macro\&meso}}^{\text{d}}$<br>[cm <sup>3</sup> g <sup>-1</sup> ] |
|-------------------------------------------|------------------------------------------------------------------|---------------------------------------------------------------------|-------------------------------------------------------------------------|---------------------------------------------------------------------------|
| W <sub>18</sub> O <sub>49</sub> /Graphene | 218                                                              | 0.26                                                                | 0.045                                                                   | 0.215                                                                     |
| W <sub>18</sub> O <sub>49</sub> /C        | 181                                                              | 0.23                                                                | 0.065                                                                   | 0.165                                                                     |

<sup>a</sup> Brunauer–Emmett–Teller surface area. <sup>b</sup> Calculated by single-point adsorption at a relative pressure of 0.98. <sup>c</sup> Calculated by V–t plot method. <sup>d</sup> Calculated by DFT method from the desorption isotherm linear plot.

548 Table S2. Summary of relative intensity ratios of all materials in Raman spectra.

| Materials                                 | Integral Area | Integral Area | $I_D/I_G$ |
|-------------------------------------------|---------------|---------------|-----------|
|                                           | / D band      | / G band      |           |
| W <sub>18</sub> O <sub>49</sub> /Graphene | 244719.25158  | 103373.78731  | 2.37      |
| W <sub>18</sub> O <sub>49</sub> /C        | 2142.78762    | 5060.35489    | 0.42      |
| AC                                        | 312977.03653  | 141618.5685   | 2.21      |

549

550 Table S3. Elemental contents of the synthesized materials determined by XPS spectra.

| Materials                                 | C (%) | N (%) | O (%) | W (%) |
|-------------------------------------------|-------|-------|-------|-------|
| W <sub>18</sub> O <sub>49</sub> /Graphene | 64.09 | 3.03  | 24.43 | 8.44  |

551

552 Table S4. Comparison of the  $W_{18}O_{49}$ /Graphene materials with the state-of-the-art

553 electrode materials.

| Materials                                       | Cell          | voltage | NaCl   | SAC    | Desalination                | Ref       |
|-------------------------------------------------|---------------|---------|--------|--------|-----------------------------|-----------|
|                                                 | configuration | (V)     | (mg/L) | (mg/g) | rate(mg/g/s) <sub>max</sub> |           |
| MoS <sub>2</sub> -Graphene                      | HCDI          | 1.2     | 500    | 19     | /                           | 11        |
| Na <sub>4</sub> Ti <sub>9</sub> O <sub>20</sub> | HCDI          | 1.4     | 250    | 23     | /                           | 12        |
| Na-birnessite                                   | HCDI          | 1.2     | 880    | 31     | /                           | 13        |
| Fe-NC                                           | CDI           | 1.2     | 500    | 36     | /                           | 1         |
| MNPC                                            | CDI           | 1.2     | 500    | 24     | /                           | 2         |
| Na <sub>2</sub> FeP <sub>2</sub> O <sub>7</sub> | HCDI          | 1.2     | 1000   | 30     | 0.081                       | 14        |
| PHCs//HCs@MnO <sub>2</sub>                      | HCDI          | 1.2     | 500    | 30     | 0.130                       | 15        |
| PCNSs                                           | CDI           | 1.1     | 500    | 15     | 0.017                       | 16        |
| Na <sub>0.44</sub> MnO <sub>2</sub>             | HCDI          | 1.2     | 585    | 31     | 0.066                       | 17        |
| SnS <sub>2</sub> @GP                            | CDI           | 1.2     | 500    | 30     | /                           | 18        |
| GPCSs                                           | CDI           | 1.2     | 500    | 19     | /                           | 19        |
| MoC@CNFA1                                       | CDI           | 1.2     | 3000   | 37     | 0.200                       | 20        |
| rGO/TiO <sub>2</sub>                            | CDI           | 0.8     | 300    | 9      | /                           | 21        |
| $W_{18}O_{49}$ /Graphene                        | CDI           | 1.2     | 1000   | 78     | 0.220                       | This work |
| $W_{18}O_{49}$ /Graphene                        | CDI           | 1.2     | 500    | 43     | 0.179                       | This work |
| $W_{18}O_{49}$ /Graphene                        | CDI           | 1.2     | 300    | 35     | 0.094                       | This work |
| $W_{18}O_{49}$ /Graphene                        | CDI           | 1.2     | 100    | 27     | 0.052                       | This work |

554

555 Table S5. Removal efficiency after 120 min of capacitive adsorption in the complex  
 556 binary-component solutions [metal nitrate (10 mg/L) and NaCl (100 mg/L)] at 1.2 V by  
 557 ICP-OES tested.

|                                                         | $C_0$ (mg/L)            | $C_t$ (mg/L)               | Removal efficiency (%) |
|---------------------------------------------------------|-------------------------|----------------------------|------------------------|
| 10 mg/L $\text{Pb}(\text{NO}_3)_2$ and 100<br>mg/L NaCl | 10 ( $\text{Pb}^{2+}$ ) | 0.031 ( $\text{Pb}^{2+}$ ) | 99.7                   |
| 10 mg/L $\text{Cr}(\text{NO}_3)_3$ and 100<br>mg/L NaCl | 10 ( $\text{Cr}^{3+}$ ) | 0.990 ( $\text{Cr}^{3+}$ ) | 99.0                   |
| 10 mg/L $\text{Cd}(\text{NO}_3)_2$ and<br>100 mg/L NaCl | 10 ( $\text{Cd}^{2+}$ ) | 0.113 ( $\text{Cd}^{2+}$ ) | 98.9                   |
| 10 mg/L $\text{Fe}(\text{NO}_3)_3$ and 100<br>mg/L NaCl | 10 ( $\text{Fe}^{3+}$ ) | 0.125 ( $\text{Fe}^{3+}$ ) | 98.8                   |
| 10 mg/L $\text{Co}(\text{NO}_3)_2$ and<br>100 mg/L NaCl | 10 ( $\text{Co}^{2+}$ ) | 0.142 ( $\text{Co}^{2+}$ ) | 98.6                   |
| 10 mg/L $\text{Ni}(\text{NO}_3)_2$ and 100<br>mg/L NaCl | 10 ( $\text{Ni}^{2+}$ ) | 0.134( $\text{Ni}^{2+}$ )  | 98.7                   |
| 10 mg/L $\text{Cu}(\text{NO}_3)_2$ and<br>100 mg/L NaCl | 10 ( $\text{Cu}^{2+}$ ) | 0.131 ( $\text{Cu}^{2+}$ ) | 98.7                   |

558

Table S6. Removal efficiency after 120 min of capacitive adsorption in the complex binary-component solutions [metal nitrate (50 mg/L) and NaCl (100 mg/L)] at 1.2 V by ICP-OES tested.

|                                                      | $C_0$ (mg/L)            | $C_t$ (mg/L)               | Removal efficiency (%) |
|------------------------------------------------------|-------------------------|----------------------------|------------------------|
| 50 mg/L $\text{Pb}(\text{NO}_3)_2$ and 100 mg/L NaCl | 50 ( $\text{Pb}^{2+}$ ) | 0.079 ( $\text{Pb}^{2+}$ ) | 99.8                   |
| 50 mg/L $\text{Cr}(\text{NO}_3)_3$ and 100 mg/L NaCl | 50 ( $\text{Cr}^{3+}$ ) | 1.371 ( $\text{Cr}^{3+}$ ) | 97.2                   |
| 50 mg/L $\text{Cd}(\text{NO}_3)_2$ and 100 mg/L NaCl | 50 ( $\text{Cd}^{2+}$ ) | 5.006 ( $\text{Cd}^{2+}$ ) | 90.0                   |
| 50 mg/L $\text{Fe}(\text{NO}_3)_3$ and 100 mg/L NaCl | 50 ( $\text{Fe}^{3+}$ ) | 3.016 ( $\text{Fe}^{3+}$ ) | 93.9                   |
| 50 mg/L $\text{Co}(\text{NO}_3)_2$ and 100 mg/L NaCl | 50 ( $\text{Co}^{2+}$ ) | 3.386 ( $\text{Co}^{2+}$ ) | 93.2                   |
| 50 mg/L $\text{Ni}(\text{NO}_3)_2$ and 100 mg/L NaCl | 50 ( $\text{Ni}^{2+}$ ) | 4.800 ( $\text{Ni}^{2+}$ ) | 90.4                   |
| 50 mg/L $\text{Cu}(\text{NO}_3)_2$ and 100 mg/L NaCl | 50 ( $\text{Cu}^{2+}$ ) | 0.864 ( $\text{Cu}^{2+}$ ) | 98.3                   |

Table S7. Removal efficiency after 120 min of capacitive adsorption in the multi-component solution containing all the seven metal nitrates (10 mg/L for each) and 100 mg/L NaCl at a constant voltage of 1.2 V by ICP-OES tested.

| Metal ions       | C <sub>0</sub> (mg/L) | C <sub>t</sub> (mg/L) | Removal efficiency (%) |
|------------------|-----------------------|-----------------------|------------------------|
| Pb <sup>2+</sup> | 10                    | 0.024                 | 99.7                   |
| Cr <sup>3+</sup> | 10                    | 0.026                 | 99.7                   |
| Cd <sup>2+</sup> | 10                    | 0.032                 | 99.6                   |
| Fe <sup>3+</sup> | 10                    | 0.011                 | 99.8                   |
| Co <sup>2+</sup> | 10                    | 0.043                 | 99.5                   |
| Ni <sup>2+</sup> | 10                    | 0.017                 | 99.8                   |
| Cu <sup>2+</sup> | 10                    | 0.090                 | 99.1                   |
| Na <sup>+</sup>  | 100                   | 74.00                 | 26.0                   |

Table S8. Removal efficiency after 120 min of capacitive adsorption in the multi-component solution containing all the seven metal nitrates (10 mg/L for each) and 500 mg/L NaCl at a constant voltage of 1.2 V by ICP-OES tested.

| Metal ions       | C <sub>0</sub> (mg/L) | C <sub>t</sub> (mg/L) | Removal efficiency (%) |
|------------------|-----------------------|-----------------------|------------------------|
| Pb <sup>2+</sup> | 10                    | 0.025                 | 99.7                   |
| Cr <sup>3+</sup> | 10                    | 0.019                 | 99.8                   |
| Cd <sup>2+</sup> | 10                    | 0.029                 | 99.7                   |
| Fe <sup>3+</sup> | 10                    | 0.010                 | 99.9                   |
| Co <sup>2+</sup> | 10                    | 0.016                 | 99.8                   |
| Ni <sup>2+</sup> | 10                    | 0.056                 | 99.4                   |
| Cu <sup>2+</sup> | 10                    | 0.032                 | 99.6                   |
| Na <sup>+</sup>  | 500                   | 437.0                 | 12.6                   |



571 Table S9. Removal efficiency after 120 min of capacitive adsorption in the multi-  
 572 component solution containing all the seven metal nitrates (50 mg/L for each) and 100  
 573 mg/L NaCl at a constant voltage of 1.2 V by ICP-OES tested.

| Metal ions       | C <sub>0</sub> (mg/L) | C <sub>t</sub> (mg/L) | Removal efficiency (%) |
|------------------|-----------------------|-----------------------|------------------------|
| Pb <sup>2+</sup> | 50                    | 2.137                 | 95.7                   |
| Cr <sup>3+</sup> | 50                    | 4.807                 | 90.3                   |
| Cd <sup>2+</sup> | 50                    | 3.313                 | 93.3                   |
| Fe <sup>3+</sup> | 50                    | 1.210                 | 97.5                   |
| Co <sup>2+</sup> | 50                    | 3.756                 | 92.4                   |
| Ni <sup>2+</sup> | 50                    | 4.281                 | 91.4                   |
| Cu <sup>2+</sup> | 50                    | 0.580                 | 98.8                   |
| Na <sup>+</sup>  | 100                   | 72.00                 | 28.0                   |

574

Table S10. Removal efficiency after 120 min of capacitive adsorption in the multi-component solution containing all the seven metal nitrates (50 mg/L for each) and 500 mg/L NaCl at a constant voltage of 1.2 V by ICP-OES tested.

| Metal ions       | C <sub>0</sub> (mg/L) | C <sub>t</sub> (mg/L) | Removal efficiency (%) |
|------------------|-----------------------|-----------------------|------------------------|
| Pb <sup>2+</sup> | 50                    | 1.527                 | 96.9                   |
| Cr <sup>3+</sup> | 50                    | 2.687                 | 94.6                   |
| Cd <sup>2+</sup> | 50                    | 1.731                 | 96.5                   |
| Fe <sup>3+</sup> | 50                    | 1.110                 | 97.8                   |
| Co <sup>2+</sup> | 50                    | 2.154                 | 95.7                   |
| Ni <sup>2+</sup> | 50                    | 2.182                 | 95.6                   |
| Cu <sup>2+</sup> | 50                    | 0.456                 | 99.1                   |
| Na <sup>+</sup>  | 500                   | 441.5                 | 11.7                   |

Table S11. Heavy metal ions concentration of 20 cycles after 120 min of capacitive adsorption in the multi-component solution containing all the seven metal nitrates (10 mg/L for each) and 100 mg/L NaCl at a constant voltage of 1.2 V by ICP-OES tested.

| Cycles`                  | 1     | 5     | 10    | 15    | 20    |
|--------------------------|-------|-------|-------|-------|-------|
| Pb <sup>2+</sup> ( mg/L) | 0.024 | 0.024 | 0.036 | 0.075 | 0.024 |
| Cr <sup>3+</sup> ( mg/L) | 0.026 | 0.021 | 0.031 | 0.021 | 0.043 |
| Cd <sup>2+</sup> ( mg/L) | 0.032 | 0.035 | 0.038 | 0.032 | 0.037 |
| Fe <sup>3+</sup> ( mg/L) | 0.011 | 0.030 | 0.053 | 0.074 | 0.070 |
| Co <sup>2+</sup> ( mg/L) | 0.043 | 0.044 | 0.042 | 0.047 | 0.051 |
| Ni <sup>2+</sup> ( mg/L) | 0.017 | 0.017 | 0.015 | 0.021 | 0.018 |
| Cu <sup>2+</sup> ( mg/L) | 0.090 | 0.064 | 0.075 | 0.015 | 0.086 |

Table S12. Removal efficiency after 120 min of capacitive adsorption in the multi-component solution containing all the seven metal nitrates (10 mg/L for each) and 100 mg/L CaCl<sub>2</sub> at a constant voltage of 1.2 V by ICP-OES tested.

| Metal ions       | C <sub>0</sub> (mg/L) | C <sub>t</sub> (mg/L) | Removal efficiency (%) |
|------------------|-----------------------|-----------------------|------------------------|
| Pb <sup>2+</sup> | 10                    | 0.035                 | 99.6                   |
| Cr <sup>3+</sup> | 10                    | 0.022                 | 99.7                   |
| Cd <sup>2+</sup> | 10                    | 0.018                 | 99.8                   |
| Fe <sup>3+</sup> | 10                    | 0.050                 | 99.5                   |
| Co <sup>2+</sup> | 10                    | 0.072                 | 99.3                   |
| Ni <sup>2+</sup> | 10                    | 0.077                 | 99.2                   |
| Cu <sup>2+</sup> | 10                    | 0.035                 | 99.6                   |
| Ca <sup>2+</sup> | 100                   | 79.00                 | 21.0                   |

587 Table S13. Removal efficiency after 120 min of capacitive adsorption in the multi-  
 588 component solution containing all the seven metal nitrates (10 mg/L for each) and 500  
 589 mg/L CaCl<sub>2</sub> at a constant voltage of 1.2 V by ICP-OES tested.

| Metal ions       | C <sub>0</sub> (mg/L) | C <sub>t</sub> (mg/L) | Removal efficiency (%) |
|------------------|-----------------------|-----------------------|------------------------|
| Pb <sup>2+</sup> | 10                    | 0.097                 | 99.0                   |
| Cr <sup>3+</sup> | 10                    | 0.019                 | 99.8                   |
| Cd <sup>2+</sup> | 10                    | 0.016                 | 99.8                   |
| Fe <sup>3+</sup> | 10                    | 0.011                 | 99.9                   |
| Co <sup>2+</sup> | 10                    | 0.037                 | 99.6                   |
| Ni <sup>2+</sup> | 10                    | 0.031                 | 99.7                   |
| Cu <sup>2+</sup> | 10                    | 0.025                 | 99.8                   |
| Ca <sup>2+</sup> | 500                   | 449.0                 | 10.2                   |

590

591 Table S14. The area corresponding to the peak position of XPS.

|                                           | W <sup>6+</sup> | W <sup>6+</sup> | W <sup>5+</sup> | W <sup>5+</sup> | W <sup>4+</sup> | W <sup>4+</sup> |
|-------------------------------------------|-----------------|-----------------|-----------------|-----------------|-----------------|-----------------|
| XPS                                       | 35.9            | 38.1            | 35.4            | 37.6            | 34.5            | 36.7            |
|                                           | eV/Area         | eV/Area         | eV/Area         | eV/Area         | eV/Area         | eV/Area         |
| W <sub>18</sub> O <sub>49</sub> /Graphene | 21225           | 19382           | 7554            | 7230            | 4577            | 5808            |
| Adsorbed Na                               | 19463           | 19691           | 7461            | 7184            | 4488            | 5685            |
| Adsorbed heavy metal ion                  | 19866           | 18803           | 7781            | 13224           | 4388            | 2959            |

592

## REFERENCES

1. Wang, G.; Yan, T.; Zhang, J.; Shi, L.; Zhang, D., Trace-Fe-enhanced capacitive deionization of saline water by boosting electron transfer of electro-adsorption sites. *Environ. Sci. Technol.* **2020**, *54*, 8411-8419.
2. Zhang, J.; Yan, T.; Fang, J.; Shen, J.; Shi, L.; Zhang, D., Enhanced capacitive deionization of saline water using N-doped rod-like porous carbon derived from dual-ligand metal-organic frameworks. *Environ. Sci-Nano.* **2020**, *7*, 926-937.
3. Liu, T.; Serrano, J.; Elliott, J.; Yang, X.; Cathcart, W.; Wang, Z.; He, Z.; Liu, G., Exceptional capacitive deionization rate and capacity by block copolymer-based porous carbon fibers. *Sci. Adv.* **2020**, *6*, eaaz0906.
4. Tan, G.; Lu, S.; Xu, N.; Gao, D.; Zhu, X., Pseudocapacitive behaviors of polypyrrole grafted activated carbon and MnO<sub>2</sub> electrodes to enable fast and efficient membrane-free capacitive deionization. *Environ. Sci. Technol.* **2020**, *54*, 5843-5852.
5. Wang, L.; Lin, S., Intrinsic tradeoff between kinetic and energetic efficiencies in membrane capacitive deionization. *Water. Res.* **2018**, *129*, 394-401.
6. Patel, S. K.; Qin, M.; Walker, W. S.; Elimelech, M., Energy efficiency of electro-driven brackish water desalination: Electrodialysis significantly outperforms membrane capacitive deionization. *Environ. Sci. Technol.* **2020**, *54*, 3663-3677.
7. Zhang, H.; Zhang, W.; Shen, J.; Li, Y.; Yan, X.; Qi, J.; Sun, X.; Shen, J.; Han, W.; Wang, L.; Li, J., Ag-doped hollow ZIFs-derived nanoporous carbon for efficient hybrid capacitive deionization. *Desalination.* **2020**, *473*, 114173.
8. Hawks, S. A.; Ramachandran, A.; Porada, S.; Campbell, P. G.; Suss, M. E.;

- 615 Biesheuvel, P. M.; Santiago, J. G.; Stadermann, M., Performance metrics for the  
616 objective assessment of capacitive deionization systems. *Water. Res.* **2019**, *152*, 126-  
617 137.
- 618 9. Lin, S., Energy efficiency of desalination: Fundamental insights from intuitive  
619 interpretation. *Environ. Sci. Technol.* **2020**, *54*, 76-84.
- 620 10. Dykstra, J.; Porada, S.; van der Wal, A.; Biesheuvel, P. Energy consumption in  
621 capacitive deionization—Constant current versus constant voltage operation. *Water. Res.*  
622 **2018**, *143*, 367-375.
- 623 11. Han, J.; Yan, T.; Shen, J.; Shi, L.; Zhang, J.; Zhang, D., Capacitive deionization of  
624 saline water by using MoS<sub>2</sub>-graphene hybrid electrodes with high volumetric  
625 adsorption capacity. *Environ. Sci. Technol.* **2019**, *53*, 12668-12676.
- 626 12. Zhou, F.; Gao, T.; Luo, M.; Li, H., Heterostructured graphene@Na<sub>4</sub>Ti<sub>9</sub>O<sub>20</sub>  
627 nanotubes for asymmetrical capacitive deionization with ultrahigh desalination capacity.  
628 *Chem. Eng. J.* **2018**, *343*, 8-15.
- 629 13. Byles, B. W.; Hayes-Oberst, B.; Pomerantseva, E., Ion removal performance,  
630 structural/compositional dynamics, and electrochemical stability of layered manganese  
631 oxide electrodes in hybrid capacitive deionization. *ACS Appl. Mater. Inter.* **2018**, *10*,  
632 32313-32322.
- 633 14. Kim, S.; Lee, J.; Kim, C.; Yoon, J., Na<sub>2</sub>FeP<sub>2</sub>O<sub>7</sub> as a novel material for hybrid  
634 capacitive deionization. *Electrochim. Acta.* **2016**, *203*, 265-271.
- 635 15. Wang, S.; Wang, G.; Wu, T.; Li, C.; Wang, Y.; Pan, X.; Zhan, F.; Zhang, Y.; Wang,  
636 S.; Qiu, J., Membrane-free hybrid capacitive deionization system based on redox



637 reaction for high-efficiency NaCl removal. *Environ. Sci. Technol.* **2019**, 53, 6292-6301.

638 16. Wu, T.; Wang, G.; Dong, Q.; Zhan, F.; Zhang, X.; Li, S.; Qiao, H.; Qiu, J., Starch  
639 derived porous carbon nanosheets for high-performance photovoltaic capacitive  
640 deionization. *Environ. Sci. Technol.* **2017**, 51, 9244-9251.

641 17. Lee, J.; Kim, S.; Kim, C.; Yoon, J., Hybrid capacitive deionization to enhance the  
642 desalination performance of capacitive techniques. *Energy. Environ. Sci.* 2014, 7, 3683-  
643 3689.

644 18. Wen, X.; Zhao, M.; Zhang, M.; Fan, X.; Zhang, D., Efficient capacitive  
645 deionization of saline water by an integrated tin disulfide nanosheet@graphite paper  
646 electrode via an in situ growth strategy. *ACS Sustain. Chem. Eng.* **2020**, 8, 1268-1275.

647 19. Wang, H.; Yan, T.; Shen, J.; Zhang, J.; Shi, L.; Zhang, D., Efficient removal of  
648 metal ions by capacitive deionization with straw waste derived graphitic porous carbon  
649 nanosheets. *Environ. Sci-Nano.* **2020**, 7, 317-326.

650 20. Liu, Y.; Zhang, Y.; Zhang, Y.; Zhang, Q.; Gao, X.; Dou, X.; Zhu, H.; Yuan, X.; Pan,  
651 L., MoC nanoparticle-embedded carbon nanofiber aerogels as flow-through electrodes  
652 for highly efficient pseudocapacitive deionization. *J. Mater. Chem. A.* **2020**, 8, 1443-  
653 1450.

654 21. El-Deen, A. G.; Choi, J.-H.; Kim, C. S.; Khalil, K. A.; Almajid, A. A.; Barakat, N.  
655 A. M., TiO<sub>2</sub> nanorod-intercalated reduced graphene oxide as high performance  
656 electrode material for membrane capacitive deionization. *Desalination.* **2015**, 361, 53-  
657 64.
